1 **TITLE:**

2 Evolution of host-microbe cell adherence by receptor domain shuffling

3 Authors:

4 EmilyClare P. Baker<sup>1</sup>, Ryan Sayegh<sup>1</sup>, Kristin M. Kohler<sup>1</sup>, Wyatt Borman<sup>1</sup>, Claire K. Goodfellow<sup>1,2</sup>, Eden R.  
5 Brush<sup>1</sup>, Matthew F. Barber<sup>1,2</sup>

6 Affiliations:

7 1 Institute of Ecology and Evolution, University of Oregon, Eugene, OR USA

8 2 Department of Biology, University of Oregon, Eugene, OR USA

9 Correspondence to: [mfbarber@uoregon.edu](mailto:mfbarber@uoregon.edu)

10 **ABSTRACT**

11 Stable adherence to epithelial surfaces is required for colonization by diverse host-associated microbes.  
12 Successful attachment of pathogenic microbes via surface adhesin molecules is also the first step in many  
13 devastating infections. Despite the primacy of epithelial adherence in establishing host-microbe associations,  
14 the evolutionary processes that shape this crucial interface remain enigmatic. Carcinoembryonic antigen  
15 associated cell adhesion molecules (CEACAMs) encompass a multifunctional family of vertebrate cell  
16 surface proteins which are recurrent targets of bacterial surface adhesins at epithelial surfaces. Here we  
17 show that multiple members of the primate CEACAM family exhibit evidence of repeated natural selection at  
18 protein surfaces targeted by bacteria, consistent with pathogen-driven evolution. Inter-species diversity of  
19 CEACAM proteins, between even closely-related great apes, determines molecular interactions with a range  
20 of bacterial adhesins. Phylogenetic analyses reveal that repeated gene conversion of CEACAM extracellular  
21 domains during primate divergence plays a key role in limiting bacterial adhesin tropism. Moreover, we  
22 demonstrate that gene conversion has continued to shape CEACAM diversity within human populations, with  
23 abundant CEACAM1 variants mediating evasion of adhesins from *Neisseria gonorrhoeae*, the causative

1 agent of gonorrhoea. Together this work reveals a mechanism by which gene conversion shapes first contact  
2 between microbes and animal hosts.

### 3 INTRODUCTION

4 Epithelial surfaces are typically the initial point of contact between metazoans and microbes (Brown and  
5 Clarke, 2017). As such, host factors at this barrier play an important role in facilitating or deterring microbial  
6 colonization. Bacterial attachment to epithelial surfaces is  
7 often mediated by a broad class of surface proteins termed  
8 adhesins (Kline et al., 2009). In addition to permitting the  
9 growth and colonization of commensal microbes, adhesins  
10 are also key virulence factors for many pathogenic bacteria.  
11 Adhesin-mediated adherence to host cells is often required  
12 for other downstream processes including biofilm  
13 formation, epithelial invasion, and the delivery of toxic  
14 effectors into host cells (Kline et al., 2009; Sadarangani et  
15 al., 2011) (Fig. 1). Microbial adherence can also trigger  
16 epithelial cell signaling cascades, further shaping host  
17 responses to resident and invasive microbes. Despite the  
18 fundamental importance of epithelial adherence for  
19 bacterial colonization and infectious disease pathogenesis,  
20 the dynamics of these interactions between host surface  
21 proteins and bacterial adhesions over evolutionary  
22 timescales remain a mystery. Theory predicts that  
23 exploitation of host proteins by pathogens places a  
24 significant burden on host populations, driving selection for beneficial mutations in these proteins that limit  
25 microbial invasion or virulence.

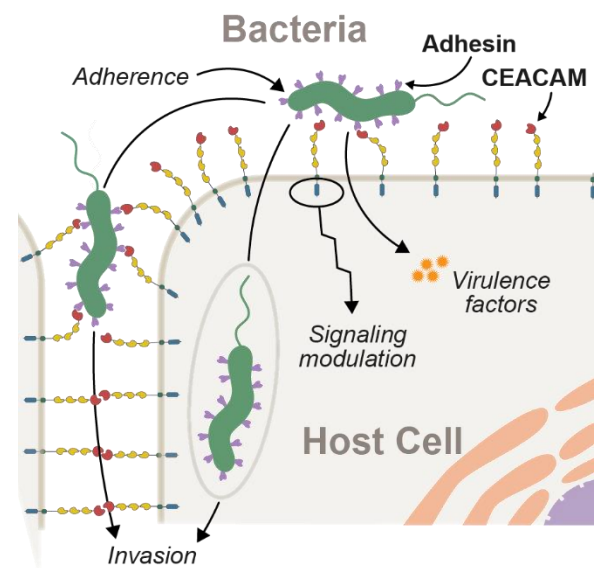

**Figure 1. Interactions between epithelial CEACAMs and bacterial adhesins.**

Bacterial attachment to host cells via adhesin proteins (purple) facilitates epithelial adherence. Adhesins also contribute to pathogenicity by promoting invasion, modulation of host cell signaling pathways, and by promoting the delivery of virulence factors into the host cell cytoplasm.

1 From a microbial perspective, host defenses can also pose an existential threat resulting in reciprocal  
2 adaptation to enhance colonization, growth, and transmission. These cycles of conflict can lead to so-called  
3 Red Queen dynamics where each population must continuously adapt simply to maintain its relative fitness  
4 (Aleru and Barber, 2020; Brockhurst et al., 2014; Hamilton et al., 1990; Van Valen, 1973). However,  
5 pathogens hijack many host factors not directly involved in immunity, possibly limiting their adaptive potential  
6 in response to pathogen interaction. For example, epithelial surface proteins are not only essential for  
7 interacting with the environment but also serve crucial cellular and physiological functions including barrier  
8 maintenance, cell-cell communication, as well as coordinating host physiological and developmental  
9 pathways (Kuespert et al., 2006). Consequently, it remains unclear the extent to which such proteins are  
10 able to adapt in the face of pathogen antagonism.

11 A major target of bacterial adhesins on vertebrate epithelia are the carcinoembryonic antigen-related cell  
12 adhesion molecule (CEACAM) family of proteins (Gray-Owen and Blumberg, 2006). Collectively, CEACAMs  
13 are expressed on nearly all vertebrate epithelial surfaces including the microbe-rich surfaces of the  
14 urogenital, respiratory, and gastrointestinal tracts. Epithelial CEACAMs play a variety of roles in cell adhesion  
15 as well as intra- and intercellular signaling (Gray-Owen and Blumberg, 2006; Kuespert et al., 2006; Tchoupa  
16 et al., 2014). A subset of CEACAMs are also expressed on other cell types, including T-cells and neutrophils  
17 where they play important roles in immune signaling and pathogen recognition. CEACAMs typically consist  
18 of an extracellular N-terminal IgV-like domain (also termed the N-domain), a variable number of IgC-like  
19 domains, and either a membrane anchor or a cytoplasmic signaling domain (Fig. S1A). Protein-protein  
20 interactions involving CEACAMs have been shown to primarily occur through the N-domain (Kuespert et al.,  
21 2007; Markel et al., 2004). While the functions of many CEACAM proteins remain obscure, mammalian  
22 CEACAM1, CEACAM5 (also known as CEA), and CEACAM6 have been shown to contribute to  
23 immunoregulation, cell-cycle progression, and development (Gray-Owen and Blumberg, 2006; Kuespert et  
24 al., 2006; Tchoupa et al., 2014).

25 A growing number of bacterial genera have been found to target CEACAM proteins to promote epithelial  
26 adherence and host colonization, including *Neisseria*, *Haemophilus*, *Escherichia*, *Fusobacterium*,  
27 *Streptococcus*, and *Helicobacter* (Brewer et al., 2019; Gray-Owen and Blumberg, 2006; Javaheri et al., 2016;

1 Königer et al., 2016; van Sorge et al., 2021). The distinct protein structures and binding mechanisms of these  
2 adhesins indicates that CEACAM recognition has arisen independently multiple times during bacterial  
3 evolution. While capable of causing serious infections, many of the bacteria that bind CEACAMs also  
4 colonize the host as benign commensals. Bacterial CEACAM recognition can lead to several distinct  
5 outcomes (Fig.1). First, adherence to epithelial CEACAMs can provide a stable habitat to support bacterial  
6 growth and proliferation. In mice, for example, expression of human CEACAM1 is sufficient to establish stable  
7 colonization by otherwise human-restricted strains of *Neisseria meningitidis* (Johsrich et al., 2013). Second,  
8 CEACAM binding may facilitate bacterial dissemination through the host epithelium (Wang et al., 1998).  
9 Third, in the case of the bacterium *Helicobacter pylori*, CEACAM-adhesin interactions promote the  
10 translocation of virulence factors into host cells via the type 4 secretion system (T4SS) leading to severe  
11 gastritis and stomach ulcers in humans (Javaheri et al., 2016; Königer et al., 2016). Finally, bacterial adhesins  
12 can potentiate CEACAM mediated signaling cascades to manipulate cellular functions, including preventing  
13 immune cell activation (Gur et al., 2019a, 2019b; Sadarangani et al., 2011), increasing cellular adhesion to  
14 prevent shedding of infected cells (Muenzner et al., 2016, 2010), and activation of apoptosis (Dje N'Guessan  
15 et al., 2007).

16 Previous work has indicated that mammalian CEACAMs have undergone repeated gene gain and loss  
17 as well as experienced high levels of sequence divergence (Adrian et al., 2019; Gibbs et al., 2007; Kammerer  
18 and Zimmermann, 2010; Pavlopoulou and Scorilas, 2014). These findings, coupled with the observation that  
19 many CEACAM-binding bacteria possess a narrow host range, suggests that host genetic variation may be  
20 a major determinant of bacterial colonization. In the case of CEACAM3, which is expressed exclusively in  
21 neutrophils and aids in destruction of CEACAM-binding bacteria, there is compelling evidence that residues  
22 at the interface of adhesin binding are evolving rapidly in a manner consistent with positive selection (Adrian  
23 et al., 2019). However, the consequences of epithelial CEACAM evolution for microbial interactions remain  
24 unclear. In this study, we investigate patterns of CEACAM divergence in primates and propose how CEACAM  
25 evolution and human polymorphisms have shaped interactions with pathogenic bacteria.

## 1 RESULTS

### 2 The CEACAM gene family exhibits repeated episodes of positive selection in primates

3 To assess patterns of primate CEACAM gene evolution, we compiled sequences of human CEACAM  
4 orthologs present in publicly available genome databases. In total nineteen representative species were  
5 analyzed including four New World monkeys, ten Old World monkeys, and five hominid species (Table S1).  
6 Some orthologs of human CEACAMs were not identified in a subset of primate genomes, likely due to losses  
7 or gains of specific CEACAMs along different lineages or incomplete genome assembly. With the exception  
8 of CEACAM3, for which additional exons annotated in Old World monkeys were included (detailed in  
9 Materials and Methods), only genomic sequences that aligned to annotated human exons were used for  
10 subsequent phylogenetic analyses. To determine if primate CEACAMs have been subject to positive  
11 selection, protein-coding sequences were analyzed using the PAML NS sites package (Yang, 2007). This  
12 program uses a maximum likelihood framework to estimate the rate of evolution of each gene or codon,  
13 expressed as the ratio of normalized nonsynonymous (dN) to synonymous (dS) nucleotide substitutions  
14 (dN/dS or  $\omega$ ), under different models of evolution. An excess of nonsynonymous substitutions relative to  
15 synonymous substitutions between orthologs can suggest that beneficial mutations have been repeatedly  
16 fixed by positive selection. A comparison of models that allow and disallow sites evolving under positive  
17 selection ( $\omega > 1$ ) can determine the likelihood that a particular protein coding sequence has been evolving  
18 under positive selection. We found that eight of the twelve primate CEACAM paralogs in our dataset possess  
19 genetic signals of positive selection (Table S1) including CEACAM1, CEACAM3, CEACAM5 and CEACAM6  
20 which have previously been shown to interact with bacterial adhesins (Gray-Owen and Blumberg, 2006). In  
21 addition, we also identified elevated  $\omega$  values for CEACAM7, CEACAM8, CEACAM18 and CEACAM20.

22 To identify specific amino acid positions that contribute to signatures of positive selection, we analyzed  
23 CEACAM sequences using the Bayes Empirical Bayes analysis as implemented in the PAML NS sites  
24 package, as well as the programs FUBAR and MEME from the HyPhy software package (Table S2). To  
25 control for the potential impact of recombination on these inferences, we used the program GARD to identify  
26 potential breakpoints in our datasets and perform phylogenetic analyses using GARD-informed phylogenies

1 for separate gene segments. Our analyses collectively revealed that sites with elevated  $\omega$  were concentrated  
2 in the N-domain of many CEACAM proteins (Fig. 2A; Fig. S1A). Sites under positive selection in CEACAM18  
3 and CEACAM20 were more dispersed throughout the protein, not localizing to a specific domain. The  
4 statistical support for positive selection of CEACAM18 and CEACAM20 in primates was also modest  
5 compared to that for other CEACAM proteins.

6 We next sought to determine the functional impact of divergence at rapidly evolving sites in the CEACAM  
7 N-domain. Residues that contribute to protein-protein interactions have been extensively annotated for  
8 CEACAM1, involving both host factors and bacterial adhesins. Overlaying sites under positive selection with  
9 known adhesin and host protein binding sites (Table S3) revealed extensive overlap between all three  
10 categories (Fig. 2B) and demonstrates that sites with elevated  $\omega$  tend to cluster on the protein binding  
11 surface. Mapping rapidly-evolving CEACAM1 residues onto a co-crystal structure of human CEACAM1 and  
12 the HopQ adhesin from *H. pylori* (Moonens et al., 2018), a known interaction partner, confirmed that multiple  
13 sites fall along the binding interface of the two proteins (Fig. 2C). In summary, these results demonstrate that  
14 multiple primate CEACAM orthologs exhibit signatures of repeated positive selection within the N-domain  
15 which facilitates bacterial and host protein interactions.

## 16 **CEACAM divergence in primates impairs recognition by multiple bacterial adhesins**

17 To assess how rapid divergence of primate CEACAMs influences recognition by bacterial adhesins, we  
18 focused on CEACAM1 which is widely-expressed across different cell types (Gray-Owen and Blumberg,  
19 2006) and has numerous well-documented microbial interactions (Table S3). Recombinant GFP-tagged  
20 CEACAM1 N-domain proteins from a panel of primate species were expressed and purified from mammalian  
21 cells (See Methods and Tables S4 & S5). Previous studies have demonstrated that the CEACAM N-domain  
22 is both necessary and sufficient to mediate interactions with bacterial adhesins (Javaheri et al., 2016;  
23 Kuespert et al., 2007; Markel et al., 2004). We focused our experiments on CEACAM1 binding to two distinct  
24 classes of bacterial adhesins: HopQ encoded by *Helicobacter pylori*, and the Opa family adhesins expressed  
25 by *Neisseria* species.



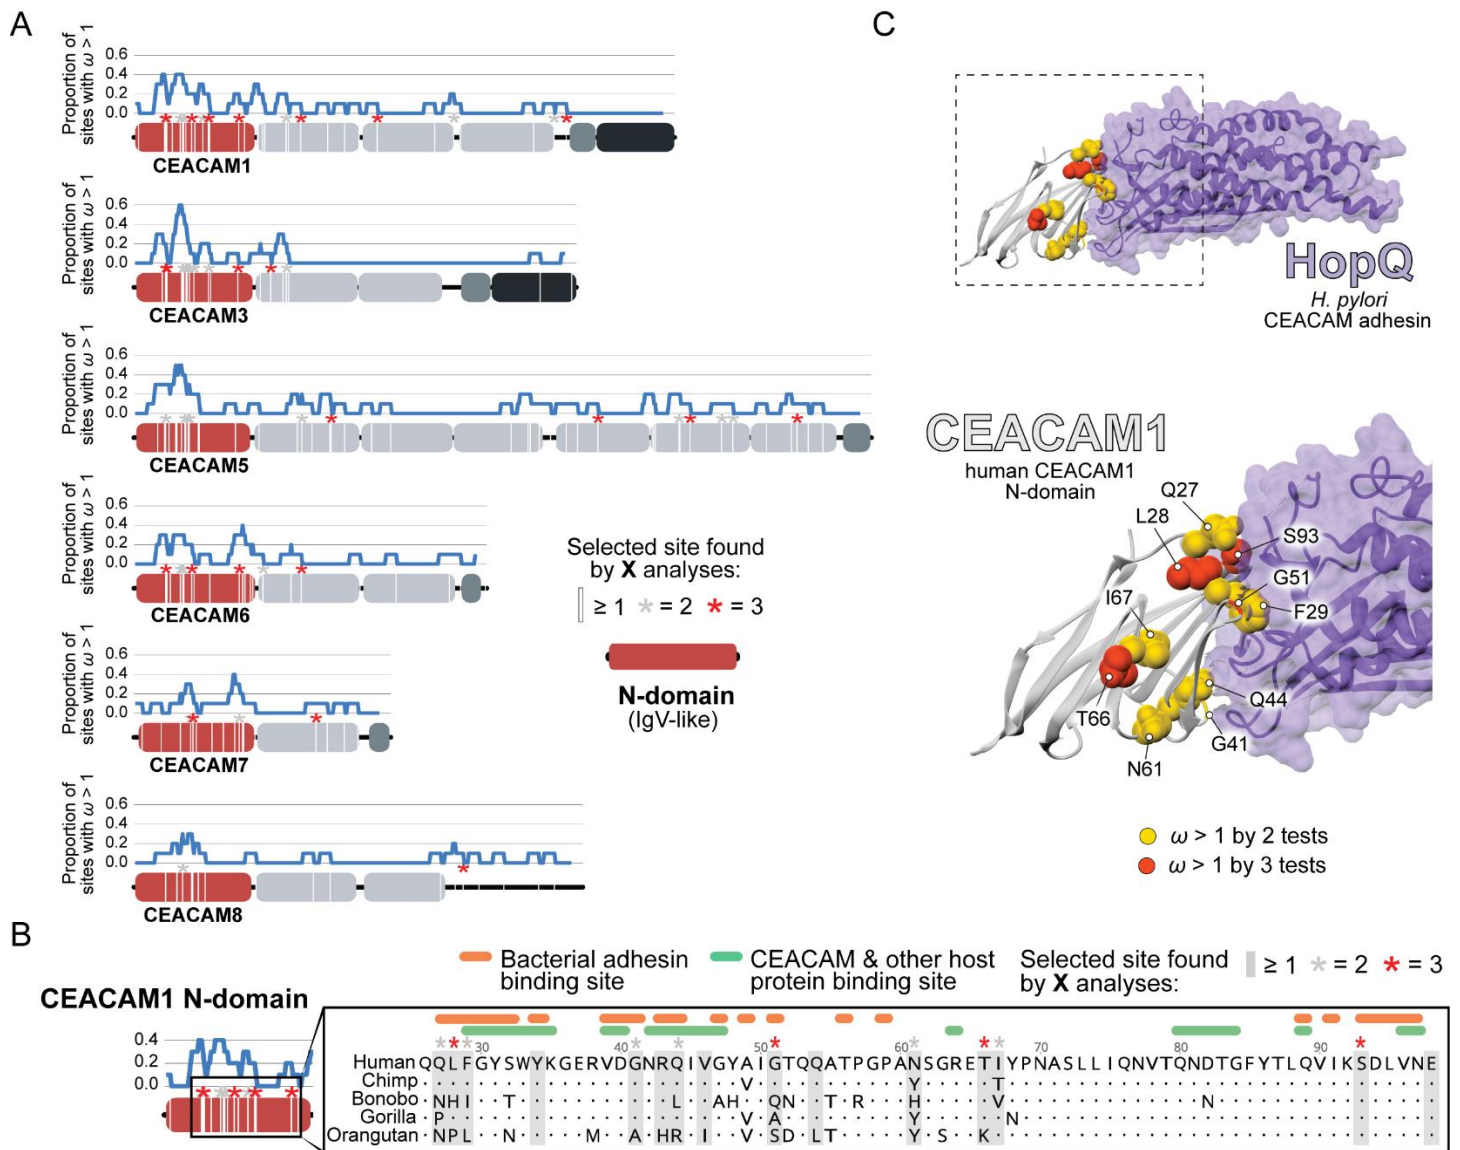

**Figure 2. Rapid evolution of primate CEACAM N-domains.** A) Sites in CEACAM proteins exhibiting elevated  $\omega$ . Domain structure of CEACAMs outlined in red (N-domain) and gray (all other domains). All rapidly evolving sites identified by at least one phylogenetic analysis (PAML, FUBAR, or MEME) are marked by a white line, sites identified by two or three tests signified by gray and red asterisks respectively. Blue line shows the proportion of rapidly evolving sites identified across a ten amino acid sliding window. B) Multiple sequence alignment of hominid CEACAM1 residues 26-98. Sites identified as evolving under positive selection and sites known to influence adhesion and host protein binding are highlighted (Table S3). C) Protein co-crystal structure of human CEACAM1 and the HopQ adhesin from *H. pylori* strain G27 (PDB ID: 6GBG). CEACAM1 sites identified as evolving under positive selection by two or more tests highlighted.

1 The HopQ adhesin is a *H. pylori*-specific outer  
 2 membrane protein that appears to be universally  
 3 encoded by *H. pylori* strains and whose interaction  
 4 with human CEACAM1 has been well-  
 5 characterized (Bonsor et al., 2018; Javaheri et al.,  
 6 2016; Königer et al., 2016; Moonens et al., 2018).  
 7 For our assays we used the common *H. pylori*  
 8 laboratory strains G27 (Baltrus et al., 2009), J99  
 9 (Alm et al., 1999), and Tx30a (ATCC® 51932),  
 10 which have previously been confirmed to bind  
 11 human CEACAM1 (Javaheri et al., 2016). The  
 12 HopQ proteins encoded by these strains  
 13 encompass the two major divisions of HopQ  
 14 diversity, termed Type I and Type II (Cao and  
 15 Cover, 2002; Javaheri et al., 2016). Strains G27  
 16 and J99 both encode a single copy of a Type I  
 17 HopQ adhesin, while Tx30a encodes a Type II  
 18 HopQ adhesin. All strains include extensive  
 19 divergence in the CEACAM1 binding region  
 20 (Bonsor et al., 2018; Moonens et al., 2018). Opa  
 21 proteins are a highly diverse class of adhesins  
 22 encoded by *Neisseria* species that are structurally  
 23 distinct from the HopQ adhesin (Bonsor et al.,  
 24 2018; Fox et al., 2014; Moonens et al., 2018;  
 25 Sadarangani et al., 2011). Despite their limited  
 26 sequence identity, both Opa52 and Opa74 are  
 27 known to bind human CEACAM1 (Roth et al.,  
 28 2013). Because *Neisseria* species typically encode

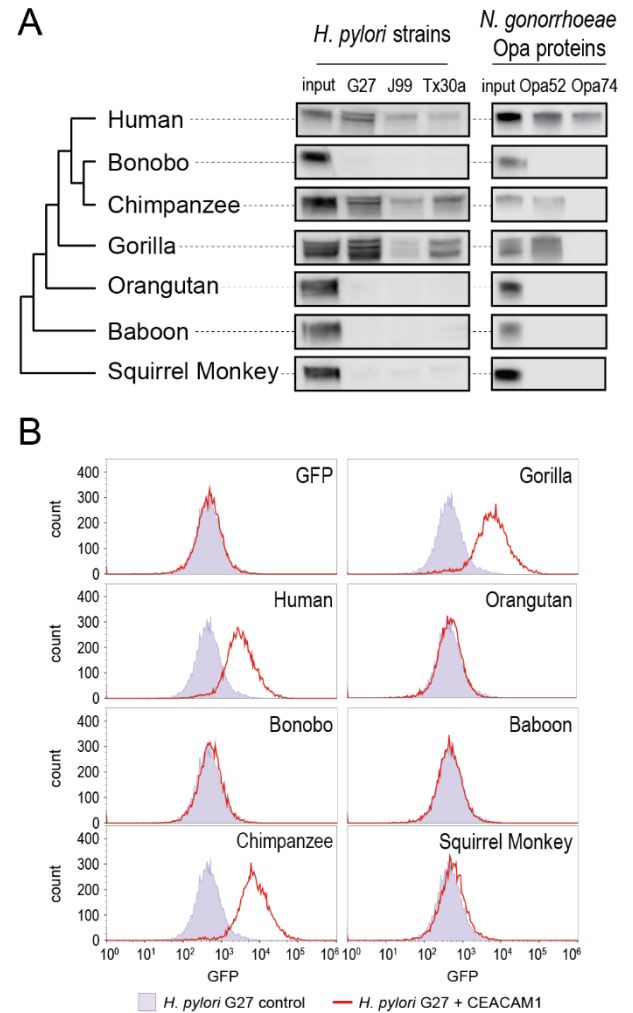

**Figure 3. CEACAM1 divergence in great apes restricts bacterial adhesin recognition.** A) Binding between primate GFP tagged CEACAM1 N-domain orthologs and bacteria determined by pull-down assays and visualized by western blotting. Input is 10% CEACAM1 protein used in bacterial pull-downs. Primate species relationships indicated by phylogenetic tree to the left. B) Pull-down experiments of *H. pylori* strain G27 incubated with CEACAM1 N-domain constructs or GFP alone assayed by flow cytometry. Binding indicated by GFP fluorescence.



1 multiple unique phase-variable Opa variants, individual Opa genes from *N. gonorrhoeae* were cloned and  
2 expressed heterologously in K12 *Escherichia coli*, which does not bind to CEACAM proteins.

3 To assess pairwise interactions between primate CEACAMs and bacterial adhesins, we incubated  
4 recombinant CEACAM1 N-domain proteins with individual bacterial strains. Bacterial cells were washed,  
5 pelleted, and the presence of bound CEACAM1 protein was assessed by western blot. We observe that all  
6 bacterial strains tested bind to the human CEACAM1 N-domain, consistent with previous studies (Fig. 3A).  
7 Incubation of *H. pylori* strain G27 with GFP alone fails to yield detectable signal, confirming that binding is  
8 CEACAM-dependent (Fig 3B). Furthermore, a  $\Delta hopq$  mutant of strain G27 does not exhibit significant  
9 CEACAM1 binding, consistent with previous reports that HopQ is the sole CEACAM-binding adhesin present  
10 in these strains (Fig. S2).

11 Examining non-human CEACAM1 bacterial binding, the chimpanzee CEACAM1 N-domain, which differs  
12 from the human protein at four amino acid positions, binds to all adhesin-expressing strains except Opa74.  
13 Gorilla CEACAM1, which differs from the human N-domain at five sites (three non-overlapping with  
14 chimpanzee) is also unable to bind Opa74 but does bind *H. pylori* strains and Opa52. Orangutan CEACAM1  
15 is unable to interact with any bacterial strains, nor do baboon and squirrel monkey. We noted that despite  
16 the limited species divergence between bonobos and chimpanzees, bonobo CEACAM1 does not bind any  
17 of the tested bacterial strains (Fig. 3A). Previous studies have found the results of CEACAM-binding assays  
18 to be consistent between western blotting and by flow cytometry (Adrian et al., 2019; Javaheri et al., 2016;  
19 Königer et al., 2016; Kuespert et al., 2007). We confirmed this for our system with *H. pylori* strain G27, using  
20 flow cytometry to detect specific binding of GFP-tagged CEACAMs on the bacterial cell surface (Fig. 3B).  
21 These results demonstrate that CEACAM1 N-domain divergence between closely-related primate species,  
22 even within the great apes, determines bacterial recognition in an adhesin-specific manner.

### 23 **Recurrent gene conversion of primate CEACAM N-domains**

24 The inability of *H. pylori* strains or *N. gonorrhoeae* adhesins to bind bonobo CEACAM1 was surprising  
25 given bonobo's close phylogenetic relationship to both humans and chimpanzees. While archaic humans are  
26 believed to have diverged from our primate relatives at least 5 million years ago, the major divergence

1 between chimpanzees and bonobos occurred only one to two million years ago (Prado-Martinez et al., 2013).  
2 Closer inspection revealed that the bonobo CEACAM1 N-domain sequence is unusually divergent from that  
3 of both humans and chimpanzees, while other regions of the coding sequence show higher degrees of  
4 identity (Fig. S3). To investigate bonobo CEACAM1 evolution further, we first validated the bonobo  
5 CEACAM1 N-domain sequence present in our bonobo reference genome through comparison of assemblies  
6 and sequencing reads from multiple bonobo individuals. Having confirmed the identity of the bonobo  
7 CEACAM1 reference sequence, we compared this gene to sequences from other hominids. Relative to its  
8 orthologs in humans and chimpanzees, bonobo CEACAM1 differs at nearly 20% of sites in the N-domain  
9 whereas humans and chimpanzees differ at only about 4% of sites. In contrast, outside of the N-domain  
10 bonobo CEACAM1 diverges from humans and chimpanzees at approximately 2% of sites, while human and  
11 chimpanzee CEACAM1 differ at around 1% of sites. We also noted that the number of divergent sites  
12 between bonobo and human in the N-domain (18 residues) is nearly identical to the number of divergent  
13 sites between bonobo and chimpanzee (20 residues), despite the closer phylogenetic relationship between  
14 bonobos and chimpanzees. In fact, the divergence between the bonobo and chimpanzee CEACAM1 N-  
15 domains is greater than that between chimpanzee and the earliest diverging member of the hominid clade,  
16 orangutan (81% versus 83% amino acid identity respectively). A comparison of N-domain sequences for  
17 CEACAM5, another rapidly evolving CEACAM, further highlights the extreme divergence of bonobo  
18 CEACAM1. Between human CEACAM5 and the bonobo and chimpanzee CEACAM5 sequences there are  
19 only ten and nine amino acid changes respectively, while bonobo and chimpanzee differ at only five sites  
20 along the entire length of the N-domain (Fig. S3B).

21 The degree of divergence within the N-domain of bonobo CEACAM1 suggests processes other than  
22 sequential accumulation of single nucleotide mutations could be responsible. One mechanism by which this  
23 could occur is through gene conversion, a form of homologous recombination in which genetic material from  
24 one location replaces sequence in a non-homologous location, often with substantial sequence similarity  
25 (Chen et al., 2007). Gene conversion is thought to be an important source of genetic novelty and a  
26 mechanism that can accelerate adaptation (Bittihn and Tsimring, 2017; Daugherty and Zanders, 2019). To  
27 determine if inter-locus recombination has shaped the evolution of CEACAM genes in primates, we looked

1 for evidence of discordance between species and gene trees. Gene-species tree discordance can be an  
2 indication of multiple evolutionary processes, including a history of gene conversion between paralogs. In a  
3 maximum likelihood-based phylogeny of full-length CEACAM coding sequences, clades containing single  
4 CEACAM paralogs were inferred with robust statistical support (Fig. 4A & Fig. S4). In general, the  
5 relationships between CEACAM homologs are inferred with high confidence and reflected species  
6 relationships as expected for the divergence of orthologous coding sequences. To determine if there have  
7 been domain-specific instances of gene conversion, we constructed phylogenetic trees of specific CEACAM  
8 domains. Typically, we expect paralog sequences to form clearly defined clades reflecting species  
9 divergence. This is the pattern we observe for full-length CEACAM coding sequences, indicating that overall  
10 the paralogs have remained distinct since their initial duplication and have steadily diverged between species.  
11 Specific CEACAM domain sequences generally follow this pattern (Fig. 4B, Sup. Figs. S5-7). However, the  
12 N-domains of CEACAM1, CEACAM3, CEACAM5 and CEACAM6 deviate strikingly from this norm and form  
13 a single monophyletic group (hereafter called CCM<sub>1356</sub>), albeit one with low bootstrap support (Fig. 4B, S5).  
14 Within the CCM<sub>1356</sub> clade we observe that rather than clustering by paralog, N-domains are split into  
15 subclades representing the three major primate lineages (Fig. 4C, Extended Fig. 1). In general, the close  
16 phylogenetic relationship of sequences within these clades is well-supported. This topology suggests that  
17 these CEACAM N-domains are more similar to paralogous domains within the same species or primate  
18 lineage than they are to their respective orthologs across species. Several well-supported nodes provide  
19 further evidence that gene conversion is driving concerted evolution within the CCM<sub>1356</sub> clade (Fig. 4C).  
20 Certain pairs of N-domains, such as CEACAM3 and CEACAM1 in gorilla and CEACAM1 and CEACAM5 in  
21 orangutan, form monophyletic groups with strong bootstrap support. As these relationships are not observed  
22 for the other domains of these CEACAM proteins, this suggests conversion events affecting only the N-  
23 domains of these CEACAMs occurred in these species. New World monkeys provide the most striking  
24 phylogenetic evidence of gene conversion among primates. For each of the four New World monkey species  
25 examined, the N-domains of CEACAM1, CEACAM5, and CEACAM6 are all more closely related within  
26 species than to their orthologs in other species, suggesting gene conversion has independently acted on the  
27 N-domains of these three CEACAMs at least four times within this single clade (Fig. 4C). These findings are  
28 consistent

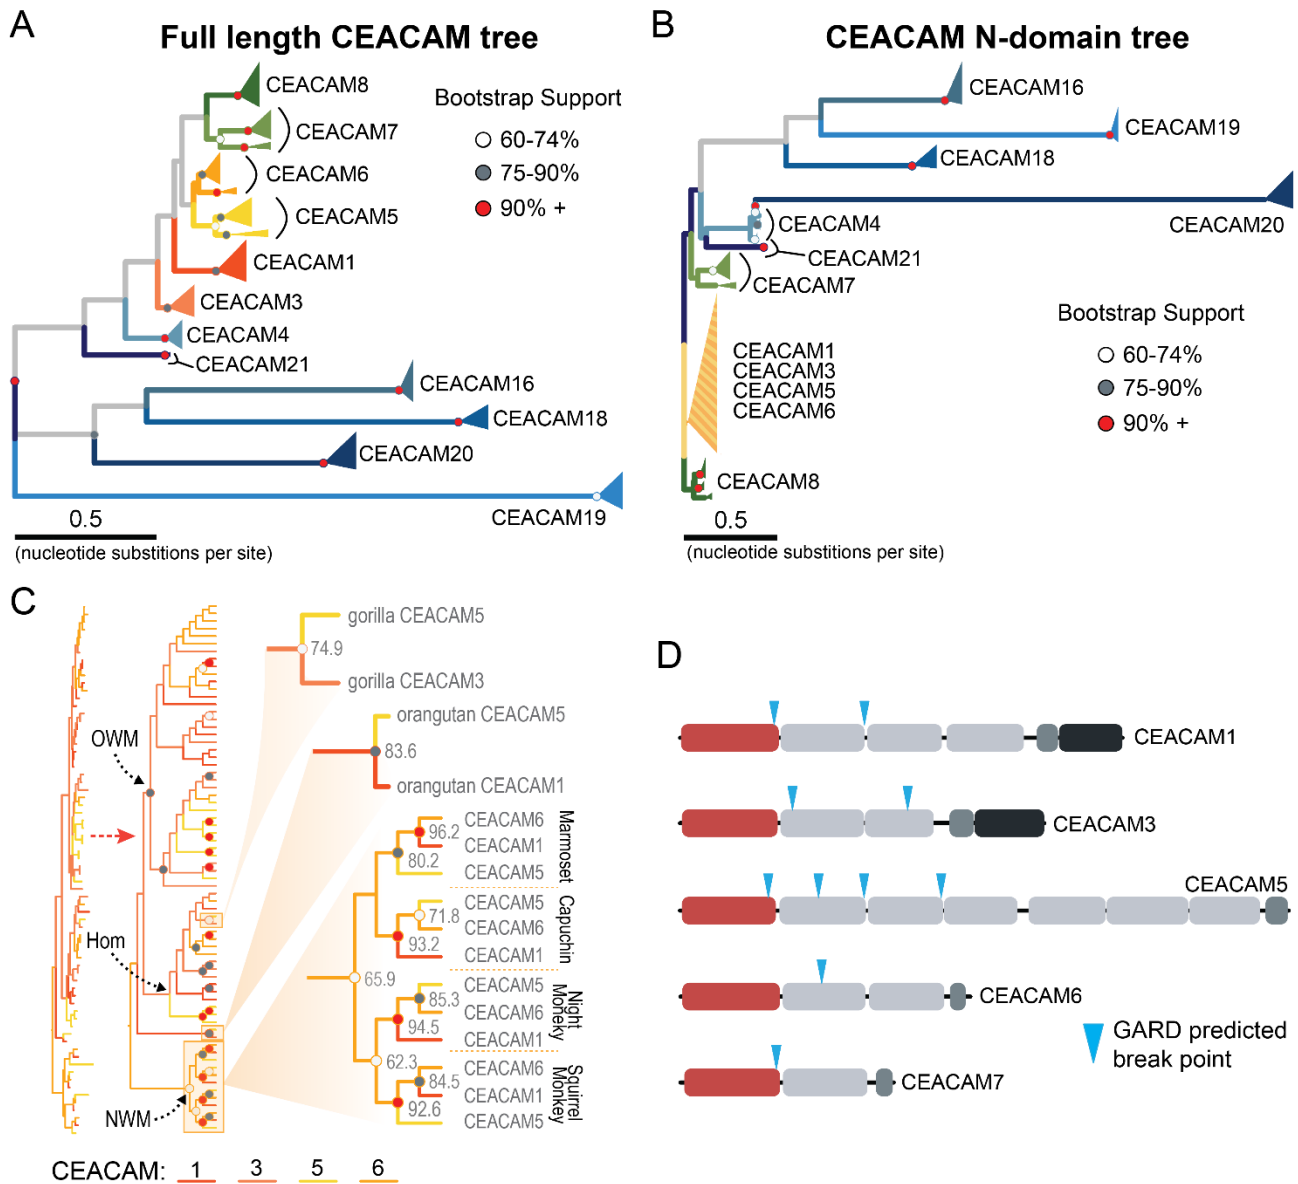

**Figure 4. Recurrent episodes of gene conversion among adhesin-binding CEACAMs.** A) Maximum-likelihood based phylogenetic reconstruction of full-length primate CEACAM protein coding sequences. B) Phylogenetic reconstruction of the IgV-like (N-domain) of primate CEACAM proteins. C) Expanded view of the clade containing the N-domains of CEACAM1, CEACAM3, CEACAM5 and CEACAM6 from panel B. Arrows indicate nodes designating clades for Old World monkeys (OWM), hominids (Hom) and New World monkeys (NWM). Specific subclades, gorilla CEACAM3 and CEACAM5, orangutan CEACAM5 and CEACAM1, and New World monkeys are further magnified and highlighted with bootstrap support at nodes. D) Domain structures of CEACAM proteins predicted to have undergone recombination by GARD analysis with sites of predicted breakpoints highlighted (blue arrows). CEACAM N-domains are denoted in red.

1 with N-domains of CEACAMs 1, 3, 5, and 6 undergoing widespread concerted evolution, likely facilitated by  
2 gene conversion.

3 To further test for evidence of gene conversion acting on primate CEACAM family members, we applied  
4 the GARD algorithm from the HyPhy software package. GARD detects topological changes between trees  
5 inferred from segments of a gene alignment, assesses the likelihood they are consistent with recombination,  
6 and identifies potential breakpoints. Consistent with our phylogenetic examination of CEACAM homologs,  
7 GARD detects strong evidence of recombination for CEACAM1, CEACAM3, CEACAM5 and CEACAM6 (Fig.  
8 4D). In all cases, breakpoints were identified at the C-terminus of the N-domain or in immediately adjacent  
9 IgC domains. This pattern is consistent with repeated N-domain gene conversion between CCM<sub>1356</sub> paralogs  
10 (Fig. 4D) and is also in line with our phylogenetic reconstructions of CEACAM IgC domains (Sup Fig.S6). In  
11 addition to CEACAM1, CEACAM3, CEACAM5, and CEACAM6, GARD also indicates a recombination  
12 breakpoint for CEACAM7 that would encompass the N-domain. While we do not detect discordance in our  
13 N-domain gene tree that implicates gene conversion involving CEACAM7, there is a single instance in the  
14 IgC domain tree of a gorilla CEACAM5 IgC domain grouping more closely with homologs of the IgC domain  
15 of CEACAM7 (Fig. S5). A breakpoint in this region is also consistent with CEACAMs with rapid N-domain  
16 evolution being involved in gene conversion events as well as previous analyses (Zid and Drouin, 2013).  
17 Together these results support a model in which gene conversion between rapidly diverging CEACAMs has  
18 contributed to N-domain diversification during primate evolution.

### 19 **Rapidly evolving regions of CEACAM1 are sufficient to block bacterial adhesin recognition**

20 Phylogenetic analyses confirm that the bonobo CEACAM1 N-domain is not closely related to other  
21 primate CEACAM1 sequences but fail to strongly support its relationship to any other single CEACAM N-  
22 domain. Reasoning that the extant bonobo CEACAM1 gene may have arisen from multiple iterative  
23 recombination events, we performed a BLAST search of genomes on the NCBI database using base pairs  
24 103-303 of the bonobo CEACAM1 sequence (corresponding to residues 1-67 of the N-domain) as our query.  
25 Human and chimpanzee are roughly 86% identical to bonobo CEACAM1 in this region versus 99% identical  
26 (a single nucleotide change) in the remaining 120 base pairs (Fig. S3A). This search identifies orangutan

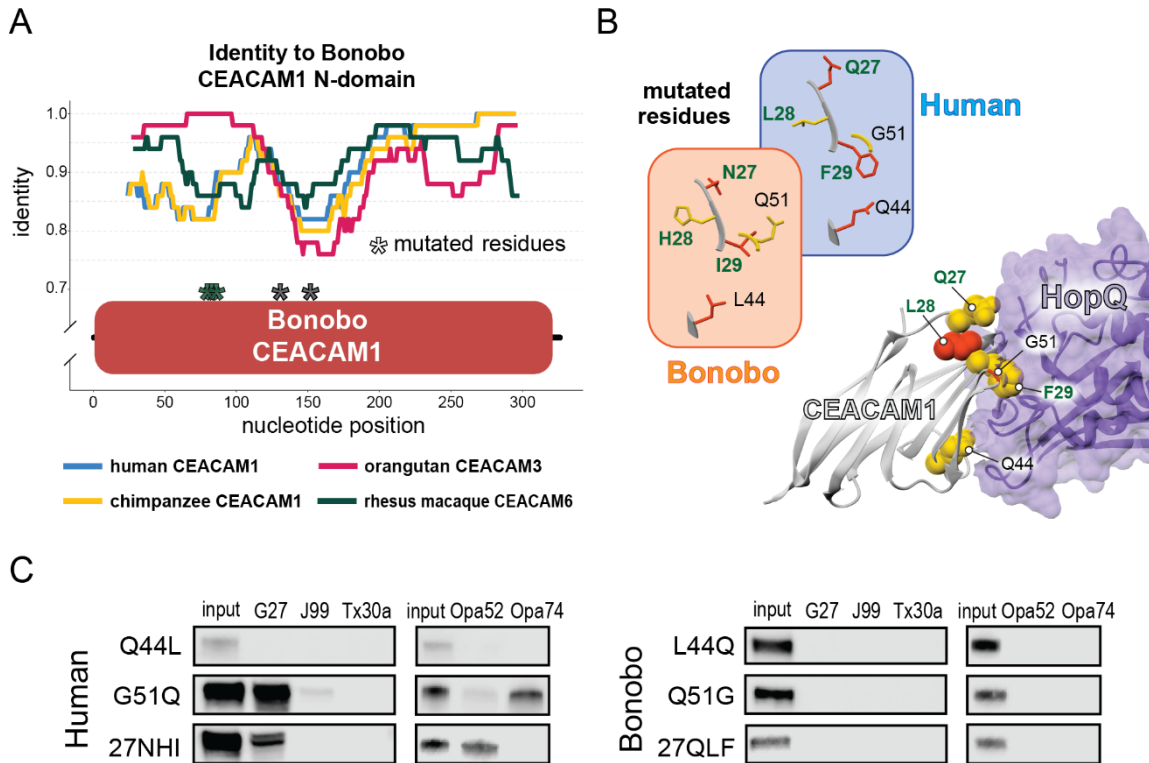

**Figure 5. Rapid divergence of the bonobo CEACAM1 N-domain impairs bacterial adhesin recognition.** A) Graph shows a fifty base pair sliding window of identity between bonobo CEACAM1 N-domain sequence and other CEACAM sequences. Asterisks mark locations of residues mutated for adhesin binding assays. B) Windows show amino acids and their structures at sites selected for mutational analysis in humans and bonobos. Lower right is a protein co-crystal structure of human CEACAM1 and *H. pylori* G27 HopQ with sites selected for mutagenesis highlighted. C) Binding between chimeric human and bonobo CEACAM1 N-domain constructs and bacterial strains assayed by pull-down experiments and visualized by western blotting.

1 CEACAM3 as the closest match. While the similarity between the first 120bp of bonobo CEACAM1 and  
 2 orangutan CEACAM3 is striking and the final third of the nucleotide sequence is nearly identical to human  
 3 and chimpanzee CEACAM1, other segments of bonobo CEACAM1 are still quite divergent from all other N-  
 4 domain sequences (Fig. 5A). A BLAST search of this region in bonobo CEACAM1 (base pairs 221-380)  
 5 indicates the greatest similarity is with the analogous region from rhesus macaque CEACAM6. However, the  
 6 increased similarity of macaque CEACAM6 in this region compared to other CEACAMs is marginal (Fig. 5A).



1       The extreme divergence of the bonobo CEACAM1 N-domain from other CEACAM1 homologs in even its  
2 closest relatives could indicate that this particular sequence has been evolving independently of other N-  
3 domain alleles for a long period of time as a result of balancing selection. This has been observed for other  
4 genes involved in host-pathogen conflicts, most notably major histocompatibility complex (MHC) alleles. In  
5 this case, we might expect to identify alleles similar to bonobo CEACAM1 currently circulating in other  
6 hominid populations, and likewise alleles similar to CEACAM1 sequences observed in humans and  
7 chimpanzees may be found in the larger bonobo population. In a search of human genetic variation data  
8 available through the International Genome Sample Resource (IGSR) accessed through the Ensembl  
9 webserver ([www.ensembl.org](http://www.ensembl.org)) there is no evidence for any alleles with similarity to bonobo CEACAM1  
10 circulating within human populations. Searching population data from the Great Apes Genome Project  
11 (Prado-Martinez et al., 2013), alleles similar to bonobo CEACAM1 are not found for chimpanzees, gorillas,  
12 or orangutans. Likewise, CEACAM1 alleles similar to those found in humans and chimpanzees are not  
13 observed in any of the bonobo genomes from the same dataset. Given the information at hand, it is difficult  
14 to precisely determine the series of mutational events that produced the bonobo CEACAM1 allele or  
15 determine the likely origin point of this allele in the diversification of hominids. However, these results are  
16 consistent with multiple independent instances of gene conversion giving rise to bonobo CEACAM1, with  
17 subsequent fixation of this haplotype in bonobo populations since their divergence from chimpanzees over  
18 the last million years.

19       Given the large number of residue changes between human and bonobo CEACAM1, we next sought to  
20 determine if a subset of rapidly-evolving sites are sufficient to either impair or restore recognition by bacterial  
21 adhesins. To test this, we generated CEACAM1 N-domain proteins in which a subset of residues between  
22 humans and bonobos were swapped. We focused on sites that are identical in humans and chimpanzees  
23 but differ in bonobos and which exhibit high  $\omega$  across primates, resulting in a total of five tested sites (Fig.  
24 5A & B). Of these residues we chose to mutate adjacent amino acids 27-29 as a single group. This patch of  
25 sites is highly variable among the rapidly-evolving CEACAMs, particularly CEACAM1, CEACAM3 and  
26 CEACAM5 (Fig. S8). None of the “humanized” mutants in the bonobo CEACAM1 background were sufficient  
27 to confer binding (Fig. 5C). In contrast, introduction of bonobo residue 44 into human CEACAM1 (mutation

1 Q44L) prevents binding by *H. pylori* and Opa expressing strains, while introduction of bonobo variable sites  
2 27-29 abolishes binding to Opa74 (Fig. 5C). Mutation G51Q has no appreciable impact on binding by *H.*  
3 *pylori* strain G27 or Opa74, but blocks binding by strain Tx30a and reduces binding to J99 and Opa52.  
4 Collectively these results reveal that multiple single positions in human CEACAM1 exhibiting signatures of  
5 positive selection are sufficient to impair recognition by multiple bacterial adhesins. Moreover, these findings  
6 also demonstrate how instances of gene conversion between CEACAM paralogs could serve as large-effect  
7 adaptive mutations during conflicts with pathogens.

## 8 **Abundant human CEACAM1 polymorphisms impair bacterial recognition**

9 Pervasive evidence of positive selection acting on CEACAMs in primates raises the question as to  
10 whether CEACAM variants that evade pathogen recognition are currently segregating in human populations.  
11 To explore the existence of human CEACAM variants and their consequences for bacterial interactions, we  
12 queried human single nucleotide polymorphism (SNP) and haplotype data for rapidly evolving CEACAM  
13 paralogs available from the International Genome Sample Resource accessed through the Ensembl genome  
14 browser (See Methods). We found that variation in the N-domains of CEACAM6, CEACAM7 and CEACAM8  
15 predominantly consists of polymorphisms not shared with other CEACAM proteins and found on isolated  
16 haplotypes. In contrast, CEACAM1, CEACAM3 and CEACAM5 N-domain variation is composed primarily of  
17 extended haplotypes (Sup Figs. S9-12). Furthermore, these extended haplotypes increase similarity between  
18 CEACAM1, CEACAM3 and CEACAM5, consistent with possible gene conversion events. Indeed, some  
19 haplotypes not only have changes at nonsynonymous sites that increase similarity with these CEACAMs,  
20 but also include multiple shared synonymous changes. These observations suggest that gene conversion  
21 among CEACAMs has occurred relatively recently and may be ongoing in human populations.

22 A search of polymorphisms for CEACAM1 in human populations reveals three high-frequency  
23 nonsynonymous variants within the N-domain: Q1K (rs8111171), A49V (rs8110904) and Q89H (rs8111468)  
24 (Fig. 6A). The haplotype containing all three alternative alleles is the most frequent non-reference CEACAM1  
25 haplotype annotated, occurring in 14% of the human population overall and in up to 43% of individuals in  
26 African populations (Fig. 6A). In total, nearly 17% of all sequenced individuals carry at least one of these high

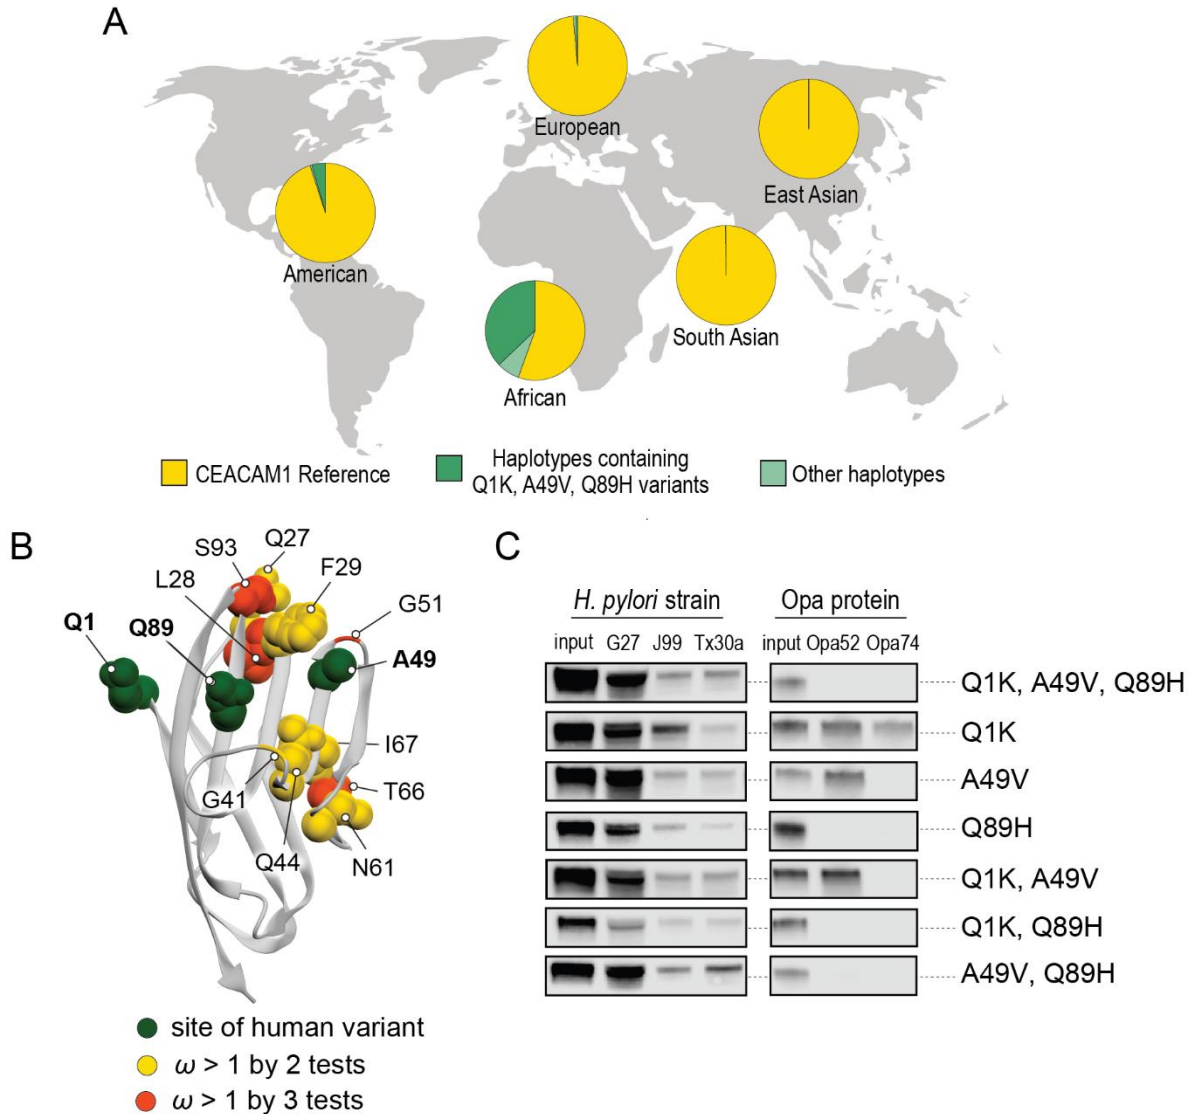

**Figure 6. Abundant human CEACAM1 variants restrict pathogen binding.** A) Frequency of haplotypes containing high frequency human variants Q1K, A49V and Q89H across human populations (map from [BioRender.com](https://www.biorender.com)). B) CEACAM1 crystal structure highlighting high frequency human variants and sites found to be evolving under positive selection across simian primates. C) Binding between combinations of high frequency human variants in the human CEACAM1 reference background and bacterial strains assayed by pulldown experiments and determined by western blotting. D) Sequence identity between the human CEACAM1-CEACAM3 hybrid allele and the human CEACAM1 and CEACAM3 reference alleles.

1 frequency SNPs (Fig. S10). Of the three variants, A49V and Q89H both lie within regions of CEACAM1  
2 known to interact with bacterial adhesins suggesting they may alter bacterial adherence (Fig. 6B). To  
3 determine if these high-frequency CEACAM1 polymorphisms affect bacterial recognition, we generated  
4 recombinant CEACAM1 N-domain variant proteins for use in our adhesin binding assays. None of the  
5 variants are able to abolish CEACAM1 binding to our panel of *H. pylori* strains (Fig. 6C). In contrast, *Neisseria*  
6 Opa expressing strains exhibit highly variable recognition of multiple human CEACAM1 variants. The Q1K  
7 mutation alone has no impact on binding, while A49V abolishes recognition by Opa74, and variant Q89H  
8 abrogates binding to both Opa52 and Opa74 (Fig. 6C). Combinatorial CEACAM1 variants reveal that these  
9 mutations behave in a dominant manner, with Q89H dominant over A49V (Fig. 6C). Together these results  
10 demonstrate that high frequency human polymorphisms in CEACAM1 are sufficient to impair binding by  
11 specific classes of bacterial adhesins present in human pathogens. These findings further suggest that high-  
12 frequency CEACAM variants could alter human colonization or infection by pathogenic *Neisseria*, including  
13 causative agents of gonorrhea and meningitis.

## 14 DISCUSSION

15 Our investigation of species-specific bacterial adherence to CEACAM1 revealed an unforeseen example  
16 of extreme genetic divergence within the great apes. The bonobo CEACAM1 gene could represent a rapid  
17 succession of single residue changes combined with multiple recombination events arising in bonobos under  
18 strong selection and/or a population bottleneck. Alternatively, this allele may be ancient and have been  
19 subject to balancing selection or incomplete lineage sorting in ancestral hominid populations. We also  
20 considered that the source of the bonobo CEACAM1 sequence may not be from functional CEACAM genes,  
21 but a pseudogenized CEACAM sequence or a pregnancy-specific glycoprotein (PSG), a family of proteins  
22 closely related to CEACAMs. However, a BLAST search of relevant NCBI databases (see Methods) fails to  
23 identify any new genomic regions in bonobos or other primates with greater sequence identity than what had  
24 already been found. While there are multiple possible explanations for the highly divergent nature of bonobo  
25 CEACAM1, absent further evidence the origin of this particular allele remains obscure. What is clear from  
26 the example of bonobo CEACAM1, however, is the extent to which gene conversion can rapidly generate  
27 diversity between closely related species and the impact of such variation on interactions with microbes.

1 During the course of investigating the origin of the bonobo CEACAM1 sequence we discovered evidence  
2 that gene conversion has shaped the evolution of many CEACAMs across primates. While we identify several  
3 instances of likely gene conversion, results from phylogenetic analyses probably represent an underestimate  
4 of the true number of recombination events that have occurred among rapidly evolving CEACAMs in  
5 primates. Repeated episodes of gene conversion can obscure past instances of recombination and hinder  
6 their identification by gene-species tree discordance. In turn, GARD analyses and recombination detection  
7 programs in general tend to miss many recombination events (Bay and Bielawski, 2011; Kosakovsky Pond  
8 et al., 2006). One particularly interesting example in orangutans implicates multiple conversion events  
9 impacting CEACAM1, CEACAM5 and CEACAM8. (Fig. S8). Phylogenetic analyses indicate a species-  
10 specific conversion event between CEACAM1 and CEACAM5 in orangutans. Prior to the CEACAM1-  
11 CEACAM5 conversion, however, residues 29-64 in either CEACAM1 or CEACAM5 were likely replaced by  
12 the homologous sequence from CEACAM8. Evidence for this event includes not only the multiple  
13 nonsynonymous substitutions shared with orangutan CEACAM8, but a shared synonymous substitution in  
14 both orangutan CEACAM1 and CEACAM5 only observed in hominid CEACAM8 homologs. Despite this  
15 evidence, neither our phylogenetic analyses nor GARD analyses suggest CEACAM8 has been involved in  
16 gene conversion. Like for CEACAM7, the involvement of CEACAM8 in intra-paralog gene conversion is  
17 consistent with CEACAMs with rapid N-domain evolution participating in gene conversion events. Overall,  
18 the rapid shuffling of genetic variation among CEACAM genes that we observe could greatly augment the  
19 potential for host adaptation in the face of microbial antagonism.

20 It has been suggested that gene conversion between CEACAM paralogs works to preserve the ability of  
21 CEACAM3 to effectively mimic bacterially antagonized CEACAMs and thereby maintain its function as a  
22 decoy receptor (Zid and Drouin, 2013; Zimmermann, 2019). Indeed, our results and those of Adrian *et al.*  
23 (Adrian et al., 2019) support the importance of gene conversion for maintaining the similarity of CEACAM3  
24 to other bacterial adhesin binding CEACAMs in apes and Old World monkeys. However, gene conversion  
25 cannot only serve to maintain CEACAM3's mimicry function. There is no evidence that New World monkeys  
26 encode a CEACAM3 homolog, yet within this group gene conversion appears to be frequent between

1 CEACAM1, CEACAM5, and CEACAM6 (Fig. 4C). Additionally, we observe multiple conversion events in  
2 hominids that do not involve CEACAM3 (Fig. 4C & Fig. S12).

3 We propose that gene conversion among  
4 epithelial CEACAMs reflects a general mechanism  
5 of pathogen evasion (Fig. 7), allowing beneficial  
6 mutations to be exchanged among CEACAMs that  
7 interact with pathogens. Gene conversion allows  
8 beneficial sets of mutations to spread, whether  
9 between decoys and targets or among antagonized  
10 epithelial CEACAMs, more rapidly than conversion  
11 of residues through independent mutational events  
12 (Bittihn and Tsimring, 2017). In addition, in the case  
13 of decoys and targets the ability of sequences to be  
14 exchanged back-and-forth limits the residues  
15 available for differentiation by pathogens and  
16 provides decoys the ability to gain binding to  
17 CEACAM antagonists through exchanges from  
18 epithelial CEACAMs. Finally, the interchangeability  
19 of the protein binding domain among antagonized  
20 CEACAMs effectively provides multiple copies of  
21 the same domain, increasing the evolutionary

22 space available to CEACAMs to evolve and test alleles, further enhancing the pace at which beneficial alleles  
23 may evolve. In this way gene conversion could provide an important mechanism by which the host can keep  
24 pace with rapidly evolving pathogenic microbes. It is also notable that the immense variation between Opa  
25 alleles, like CEACAMs, has been shown to involve a combination of rapid substitutions and recombination  
26 between extracellular loop domains that recognize host factors and serve as potential antigens for the host

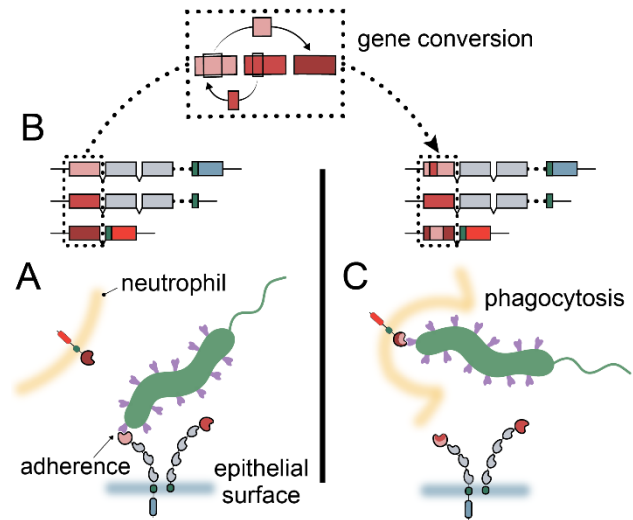

**Figure 7. Model of CEACAM evolution in primates.** A) Bacterial adhesins recognize a subset of epithelial CEACAM proteins and avoid binding with decoy CEACAM receptors present on neutrophils. B) Gene conversion facilitates the shuffling of regions of the CEACAM N-domain that alter binding to bacterial adhesins. C) Through gene conversion outlined in B, epithelial CEACAM proteins avoid binding by bacterial adhesins while the CEACAM decoy receptor gains binding triggering bacterial clearance through phagocytosis.



1 adaptive immune system. In this regard CEACAM-Opa interactions reflect an unusual evolutionary dynamic  
2 in which recombination likely plays a crucial role in reciprocal adaptation.

3 In addition to exploring the role of CEACAM gene conversion among primates, we provide evidence that  
4 this process continues to shape CEACAM diversity within human populations. The three human CEACAM1  
5 variants we test in our adhesin binding assay are part of a group of related CEACAM1 haplotypes that  
6 increase sequence similarity to CEACAM3 and/or CEACAM5 (Figs. S9 & S10). Extended haplotypes that  
7 increase similarly to CEACAM1 at both synonymous and nonsynonymous positions in the N-domain are also  
8 found for CEACAM3 and CEACAM5 in humans (Figs. S11-S12). Indeed, haplotypes consisting of variants  
9 of putative recombination events are the most common non-reference alleles for CEACAM1, CEACAM3, and  
10 CEACAM5 (Fig. 6A, S10-12). Variant sites in these proteins tend to lie along the protein binding interface of  
11 the N-domain and often impact residues known to influence adhesin recognition. The relationships between  
12 these different CEACAM haplotypes appears to be complex, as many different combinations of partial variant  
13 haplotypes exist for each CEACAM paralog. The haplotype structures we observe suggest these CEACAM  
14 variants are the result of one or more recombination events between paralogous sequences, likely followed  
15 by further recombination with the major CEACAM allele.

16 Important questions remain regarding the rapid evolution of a subset of primate CEACAM proteins.  
17 Among these questions is why CEACAM7 and CEACAM8 show similar patterns of evolution to bacterially  
18 antagonized CEACAMs despite no known instances of bacterial antagonism. The simplest explanation is  
19 that CEACAM7 and CEACAM8 are themselves the targets of as yet unidentified pathogen antagonists  
20 (Sintsova et al., 2015). Alternatively, their rapid evolution may reflect pressure to maintain binding with rapidly  
21 evolving CEACAMs (Gray-Owen and Blumberg, 2006; Skubitz and Skubitz, 2008), could merely be a result  
22 of their genomic proximity to rapidly evolving CEACAMs prone to gene conversion (Zid and Drouin, 2013) or  
23 could be the result of some as yet unknown evolutionary pressures.

24 Another intriguing aspect of rapid CEACAM evolution is the impact rapid divergence might have outside  
25 of interactions with pathogenic microbes. Given the extensive overlap of CEACAM binding sites among  
26 unrelated bacterial adhesins, the ramifications of rapid CEACAM evolution likely extend beyond the adhesins

1 of pathogens to those of commensal and beneficial microbes as well. For commensal microbes which rely  
2 on these interaction surfaces, pathogen-driven evolution could significantly alter their ability to colonize the  
3 host. The impact of CEACAM divergence on composition of the host microbiome and/or the evolution of  
4 commensal strains warrants further investigation.

5       Studies of other “housekeeping” proteins targeted by pathogens have found that sites under positive  
6 selection typically do not overlap with sites involved in essential host functions (Barber and Elde, 2014;  
7 Demogines et al., 2013). This is clearly not the case for CEACAMs, where we observed extensive overlap  
8 between sites involved in host protein interactions, sites targeted by bacterial adhesins and sites undergoing  
9 rapid evolution (Fig. 2B). How CEACAMs are able to rapidly evolve while maintaining their other essential  
10 host protein interactions remains a mystery. Future studies on CEACAM protein functions, interaction  
11 networks, and pathogen antagonism will likely clarify these outstanding questions regarding rapidly evolving  
12 CEACAMs.

13       Collectively our study provides evidence that repeated adaptation among primate CEACAMs has shaped  
14 host-specific cell adherence by diverse pathogenic bacteria. We find that over half of the CEACAM paralogs  
15 found in humans display signatures of positive selection across the primate lineage, localized primarily to the  
16 extracellular N-domain. We further discovered that rapid evolution of CEACAM N-domains has been  
17 facilitated by extensive “shuffling” of sequences between a subset of CEACAM paralogs through repeated  
18 gene conversion. The diversification of primate CEACAM N-domain sequences has likely had significant  
19 consequences for interactions between primates and bacteria. Consistent with observations across other  
20 primate species, we also provide evidence that gene conversion events impact bacterial pathogen  
21 recognition of CEACAMs in contemporary human populations. Together this work reveals how dynamic  
22 evolutionary processes have shaped bacterial-host associations with consequences for infectious disease  
23 susceptibility.

## 1 MATERIALS AND METHODS

### 2 Primate comparative genetics

#### 3 *Sequence identification*

4 Orthologs for human CEACAM genes were identified through BLAST searches of primate reference  
5 genomes available through the NCBI BLAST webserver (Boratyn et al., 2013). Full length genomic regions  
6 for annotated human CEACAMs were used as query sequences. A full record of CEACAM orthologs  
7 identified and a partial record of BLAST results, including date accessed, query coverage and identity, as  
8 well as information on synteny, are listed in supplementary ExcelS1. Orthology was established by sequence  
9 identity, reciprocal best-BLAST hit, as well as intron structure and synteny. In total, we were able to extract  
10 186 primate CEACAM sequences for analysis. We could not identify orthologs of every human CEACAM in  
11 every primate species, in some cases because of lineage specific gains and losses and in some cases likely  
12 because of incomplete genome assembly. As a result, the number of primate orthologs available for  
13 evolutionary analysis and phylogenetic reconstruction for each human CEACAM range from 11-19  
14 (ExcelS1).

#### 15 *Sequence alignment & trimming*

16 Orthologous protein coding sequences were extracted from CEACAM genes as follows. Multiple  
17 sequence alignments of the full-length gene were done using MAFFT alignment software as implemented in  
18 Geneious Prime 2020.2.2 with default settings. Alignments were manually corrected to correspond to human  
19 exon splice sites. Regions corresponding to human exons were then extracted, realigned, and minimally  
20 trimmed so all sequences were in-frame and orthologous codons aligned. So as not to exclude any protein  
21 coding regions from evolutionary analysis all human exons for a given CEACAM were concatenated and  
22 treated as a single protein coding sequence. Consequently, representations of CEACAM proteins in figures  
23 are not necessarily indicative of mature peptides, but rather represent all parts of the CEACAM protein that  
24 could potentially have been subject to positive selection. Gaps in alignments were removed for evolutionary  
25 analyses but were retained for tree building.

## 1 *CEACAM3 exons*

2       Almost all Old World monkey *CEACAM3* genes analyzed had two extra exons annotated compared to  
3 humans. These exons are located between the exon encoding the N-domain and the transmembrane domain  
4 and are predicted by InterProScan (Quevillon et al., 2005), as implemented in Geneious Prime 2020.2.2, to  
5 encode the IgC-like domains typical of this region of *CEACAM* proteins. The majority of Old World monkeys  
6 have two exons annotated and all primates, including hominids, have strongly conserved sequences in this  
7 region, though hominids all encode premature stop codons. With the exception of the second IgC exon in  
8 colobus, these exons would allow for the translation of full length *CEACAM* proteins. While exon annotation  
9 differences between primate *CEACAM* genes is not unusual, the conservation of these sequences across  
10 primates containing a *CEACAM3* gene, including in hominids where they are not annotated, was striking. To  
11 the best of our knowledge *CEACAM3* transcripts for humans or other primates including either of these extra  
12 IgC domains have not been reported and indeed, the exon closest to the N-domain likely does not encode a  
13 functional protein in most hominids as a result of a premature stop codon. However, the strong conservation  
14 of these sequences across primates could indicate these exons encode functional protein segments in at  
15 least some species. For this reason, these exons and their orthologous sequences in hominids were included  
16 in downstream evolutionary analyses.

## 17 *CEACAM5 trimming*

18       The differences in number and likely arrangement of IgC domains in primate *CEACAM5* orthologs  
19 prevented alignment of all full length *CEACAM5* genes into a single multiple sequence alignment for  
20 extracting human orthologous protein coding sequences. Instead, sequences were first aligned in three  
21 groups; New World monkeys, leaf-eating monkeys (black-and-white colobus, black snub-nosed monkey and  
22 golden snub-nosed monkey), and the remaining Old World monkey sequences with the hominid sequences.  
23 There were enough similarities with human exons for orthologous exon sequences to be assigned and  
24 extracted for New World monkeys and the Old World monkey/Hominid group, but not for the leaf-eating  
25 monkeys group. For leaf-eating monkeys the predicted exons in common between species in this group were  
26 extracted. After extracting coding sequences for each group individually the extracted sequences were then

1 aligned in a single multiple sequence alignment. However, the large gaps caused by missing IgC sequences  
2 relative to human CEACAM5 posed a problem for evolutionary analyses which require gaps to be removed  
3 from sequences prior to analysis. We were concerned that choices made regarding which sequences were  
4 removed would unduly influence the results of evolutionary analyses or result in lower coverage of the  
5 evolutionary history of the entire coding sequence. To account for this, three strategies of trimming alignment  
6 gaps were carried out and the results of each used in separate evolutionary analyses. For the first strategy  
7 every species whose sequence contained gaps corresponding to missing IgC domains was removed. These  
8 species were black-and-white colobus, black snub-nosed monkey, golden snub-nosed monkey, drill, sooty  
9 mangabey, and common marmoset. This resulted in the longest sequence for analysis (2 Kb) including 6  
10 predicted IgC domains, but the smallest number of species represented (12). In the second strategy primate  
11 sequences with gaps corresponding to the largest number of missing IgC domains (four) were removed,  
12 while those with only two missing domains were retained, and the alignment region containing the sequence  
13 gap caused by the missing domains removed, giving a smaller alignment (1.4 Kb, with four IgC domains),  
14 but more species (16). For this strategy sooty mangabey, and common marmoset were removed from the  
15 analysis. For the third strategy all species for which complete CEACAM5 gene sequences could be identified  
16 were retained and all gaps corresponding to missing IgC domains removed. This gave the smallest sequence  
17 (0.9 Kb, retaining two IgC domains), but provided the largest number of represented species (18).  
18 Evolutionary analyses for these strategies are included in Fig S1, TableS1 and Table S2.

### 19 *Alignment comparison between MAFFT and MUSCLE*

20 To confirm that our alignment method was not biasing the assignment of orthology of coding sequences  
21 to human exons, we compared the results of alignments of extracted exons using MAFFT (Kato and  
22 Standley, 2013) and the alternative program MUSCLE (Edgar, 2004), both as implemented in Geneious  
23 Prime 2020.2.2. With the exceptions of CEACAM7 and CEACAM5 there were no drastic changes between  
24 alignments performed using MAFFT and those done using MUSCLE. Upon inspection the discrepancy  
25 between MAFFT and MUSCLE alignments for CEACAM7 could be attributed to an approximately 7 Kb  
26 insertion in the orangutan CEACAM7 gene relative to all other primates. Upon removing this insertion  
27 alignments with both MAFFT and MUSCLE were in agreement. Discrepancies between alignments of

1 CEACAM5 with MAFFT and MUSCLE were due to differences in how the programs aligned sequences  
2 corresponding to IgC domains, likely as a result of differences in the number and possibly the arrangement  
3 of sequences coding for IgC domains between primates. MAFFT and MUSCLE alignments were carried out  
4 for each of the three different trimmed versions of CEACAM5 (see above) and each set of sequence  
5 alignments was tested using each of the evolutionary analysis methods. All other evolutionary analyses were  
6 carried out using sequences trimmed according to MAFFT alignments.

7 The results of CEACAM5 evolutionary analyses were largely similar regardless of which alignment or  
8 trimming method was employed, identifying similar patterns of selection (sites under selection concentrated  
9 in the N-domain) and many of the same sites under selection. Results presented in the paper are for dataset  
10 1 (ds1) which contains the largest number of domains and using the MAFFT alignment to match the method  
11 used for other CEACAM analyses presented. Results for alternative CEACAM5 trimming and alignment  
12 methods are included in Fig S1, Table S1 and Table S2.

### 13 *Bonobo CEACAM1 N-domain sequence verification*

14 Bonobo genomic DNA was not available for direct sequencing of CEACAM1, so currently available  
15 bonobo genome sequence data was used for sequence verification. While the genome assembly from which  
16 bonobo CEACAM sequences were identified for evolutionary analyses did not have reads available, a more  
17 recent assembly of a different bonobo individual became available during the course of this study which did  
18 deposit sequencing reads along with a *de novo* genome assembly (Mao et al., 2021). The CEACAM1  
19 genomic region of the newer assembly was 99% identical to the older version while the coding sequences  
20 differ at only a single nucleotide outside of the N-domain. Furthermore, examining the reads used to  
21 assemble the newer genome we confirmed that multiple reads covered the length of the bonobo CEACAM1  
22 N-domain and included the highly diverged nucleotides of the binding region in contiguous reads.  
23 Additionally, we examined CEACAM1 sequences for the thirteen bonobo individuals sequenced as part of  
24 the Great Apes Genome Project (Prado-Martinez et al., 2013). Genomes for these individuals were  
25 constructed using a reference based assembly method to the human genome. The assembled sequences  
26 largely supported the highly diverged N-domain seen in the reference genome; however there was a 31 bp



1 region that was identical to the human CEACAM1 sequence rather than the two *de novo* bonobo sequences.  
2 Examining reads from these individuals failed to support human sequences at this position and in fact  
3 supported the more divergent sequence seen in the bonobo *de novo* assemblies. Nucleotide BLAST  
4 searches on the NCBI webservice for bonobo N-domain sequences were performed with query sequences  
5 searching against the RefSeq Genome Database (refseq\_genomes) for the organism groups  
6 “Homo/Pan/Gorilla groups” (taxid:207598) and “Primates” (taxid: 9443), while excluding “bonobos”  
7 (taxid:9597).

#### 8 *Identification of human CEACAM N-domain variation*

9 Human haplotype data for CEACAM1, CEACAM3, CEACAM5, CEACAM6, CEACAM7, and CEACAM8,  
10 available through the International Genome Sample Resource (<https://www.internationalgenome.org/>) was  
11 accessed through the Ensemble genome browser (<https://www.ensembl.org/>). For each CEACAM the  
12 haplotypes identified for the Matched Annotation from NCBI and EMBL-EBI (MANE) Select v0.92 transcript  
13 were used. All coding sequence haplotypes for the MANE Select transcript were downloaded and analyzed  
14 in excel as well as in R using custom scripts.

#### 15 **Phylogenetic analyses**

##### 16 *PAML/FUBAR/MEME/GARD*

17 Evolutionary analyses were performed individually for each group of human CEACAM coding sequence  
18 orthologs. Only CEACAM21 was excluded from evolutionary analyses, since it was found only in hominid  
19 genomes and has likely been lost in the pan lineage (ExcelS1) resulting in only three closely related  
20 sequences being available for comparison, insufficient for robust phylogenetic based evolutionary analysis.  
21 CEACAM21 sequences were included in subsequent phylogenetic reconstructions.

22 CEACAM coding sequences were tested for evidence of positive selection using the PAML NS sites  
23 program under the codon model F3x4 (Yang, 2007). To determine the likelihood a gene was evolving under  
24 positive selection, log-likelihood tests were performed comparing the models of selection M1&M2 as well as  
25 M7&M8 (Table S1). Sites evolving under positive selection were identified by PAML using the Bayes

1 Empirical Bayes analysis as implemented in the NS sites package for evolutionary Model 2, which has been  
2 shown to be more robust to error due to recombination than the alternative, Model 8, when identifying sites  
3 under selection (Anisimova et al., 2003). In addition, sites under selection were identified (Table S2) using  
4 the HyPhy package programs FUBAR and MEME (Murrell et al., 2013, 2012) as implemented on the  
5 Datamonkey web servers ([www.datamonkey.org](http://www.datamonkey.org) and [classic.datamonkey.org](http://classic.datamonkey.org) respectively) (Delport et al.,  
6 2010; Kosakovsky Pond and Frost, 2005; Pond et al., 2005; Weaver et al., 2018). For FUBAR and initial  
7 MEME analyses, species trees of the relevant primates were provided to inform analyses of evolution. HyPhy  
8 GARD analyses ([classic.datamonkey.org](http://classic.datamonkey.org)) were used to identify evidence of recombination and the number  
9 and approximate locations of breakpoints (Kosakovsky Pond et al., 2006). When GARD detected evidence  
10 of recombination, updated GARD informed phylogenies were used for MEME analyses to account for errors  
11 in calling sites under selection due to recombination. Prior to running MEME and GARD analyses the  
12 “automatic model selection tool” provided by [classic.datamonkey.org](http://classic.datamonkey.org) was used to determine the most  
13 appropriate model of selection under which to run analyses. For PAML, sites with posterior probability >0.95  
14 were considered to have strong support to be evolving under positive selection (Yang et al., 2005), while  
15 >0.9 posterior probability supported sites found by FUBAR (Murrell et al., 2013) and p-values ≤0.05  
16 supported sites found by MEME (Murrell et al., 2012).

### 17 *Tree building*

18 Phylogenetic trees were constructed using our panel of primate CEACAM coding sequences identified  
19 as described above. Multiple sequence alignments on which tree constructions were based were done by  
20 translation alignment using default settings of the MAFFT sequence alignment software as implemented in  
21 Geneious Prime 2020.2.2. For domain specific phylogenetic reconstruction domains were identified using  
22 InterProScan (Quevillon et al., 2005) in Geneious Prime. Assignments for immunoglobulin-like domains, that  
23 is the IgV-like (N-domain) and IgC domains were based on predictions by the Superfamily database (Wilson  
24 et al., 2009) and cytoplasmic domain assignments were based on the PHOBIUS database (Käll et al., 2004).  
25 Transmembrane domains were excluded from analyses due to their particularly small sequence length, which  
26 can make tree building unreliable due to limited phylogenetically informative sites. Indeed, relatively short  
27 sequence lengths for the other domains, typically around 300 bps or less, along with often high sequence

1 similarity likely decreased the reliability and statistical support for our domain trees. However, even with these  
2 limitations in many cases relationships between domains were resolved with high bootstrap support,  
3 particularly for peripheral nodes and clades and for CEACAMs not found to be evolving rapidly. Phylogenetic  
4 reconstructions were done using the PhyML 3.0 web browser (<http://www.atgc-montpellier.fr/phyml/>) with  
5 default settings and confidence testing by 1000 bootstrap replicates (Guindon et al., 2010).

## 6 *Data visualization*

7 Visualization of evolutionary analyses, phylogenetic trees, sequence identity, and haplotype frequencies  
8 was done in R (R Core Team, 2019) using the R packages BiocManager (Morgan, 2019), treeio (Wang et  
9 al., 2019), ggplot2 (Wickham, 2016), ggtree (Yu et al., 2018, 2017), evobiR (Blackmon and Adams, 2015),  
10 and ggforce (Pedersen, 2021). Protein structures were visualized using the UCSF Chimera package version  
11 1.13.1. Chimera is developed by the Resource for Biocomputing, Visualization, and Informatics at the  
12 University of California, San Francisco (supported by NIGMS P41-GM103311) (Pettersen et al., 2004).

## 13 **CEACAM1 Binding Assays**

### 14 *Recombinant CEACAM1 expression plasmid construction*

15 Plasmids encoding primate CEACAM1 N-domains were constructed by assembly PCR and ligation  
16 independent cloning (LIC) into the pcDNA3 GFP LIC vector (6D) (a gift from Scott Gradia; Addgene plasmid  
17 #30127). A detailed description of the assembly PCRs is provided in the Supplementary Methods and the  
18 DNA oligomers and templates are described in Supplementary Tables S4 and S5. Briefly, oligonucleotides  
19 were designed to assemble expression cassettes containing the human IgK signal sequence followed by a  
20 primate CEACAM1 N-terminal domain, and finally a STREPII tag and Tobacco Etch Virus (TEV) protease  
21 site. LIC cloning of the primate CEACAM1 N-terminal expression cassettes into pcDNA2 GFP LIC (6D) was  
22 performed following the protocol provided by the California Institute for Quantitative Biosciences at Berkeley  
23 (<https://qb3.berkeley.edu/facility/qb3-macrolab/projects/lic-cloning-protocol/>). Mutations to introduce bonobo  
24 CEACAM1 residues and population variants into the human CEACAM1 reference as well human CEACAM1  
25 residues into the bonobo CEACAM1 reference sequence were done by site directed mutagenesis using

1 mutation specific primers designed using the Agilent QuikChange Primer Design tool  
2 (<https://www.chem.agilent.com/store/primerDesignProgram.jsp>), then transformed into One Shot™ Top10  
3 chemically competent cells for amplification and sequence verification. Plasmids were extracted for further  
4 use using the ZymoPURE™ II Plasmid Maxiprep kit.

5 Recombinant CEACAM1 expression plasmids were transfected into Human HEK293T cells using the  
6 Lipofectamine™ 3000 transfection kit following manufacturers instructions. Two days post transfection cell  
7 supernatant was collected and filter sterilized and cells were collected and lysed. Expression of proteins was  
8 confirmed by western blotting (detailed below).

### 9 *Bacterial strains & culture*

10 *H. pylori* strains G27 (Baltrus et al., 2009) J99 (Alm et al., 1999), Tx30a (ATCC® 51932), and the G27  
11 HopQ deletion strain (*omp27::cat-sacB* in NSH57) (Yang et al., 2019) were cultured microaerobically at 37°C  
12 on Columbia agar plates supplemented with 5% horse blood 0.2% beta cyclodextrin, 0.01% amphotericin B,  
13 and 0.02% vancomycin. To assay binding between recombinant primate CEACAM1 N-domain proteins and  
14 *H. pylori* strains, *H. pylori* strains were grown for two to five days on solid media, collected and suspended in  
15 Brain Heart Infusion Media. 500uL of bacterial suspension were then incubated with 100uL of CEACAM  
16 protein for thirty minutes, rotating on a nutator. Bacteria were then washed twice with cold PBS. Samples to  
17 be visualized by western blotting were pelleted and resuspended in 1x Laemmli Buffer. Samples to be  
18 examined by flow cytometry were suspended in 0.5-1 mL of PBS.

19 The use of *Escherichia coli* to express MS11 and VP1 *Neisseria gonorrhoeae* Opa proteins was  
20 described previously (Roth et al., 2013). For this project plasmids expressing Opa proteins, Opa52 (Kupsch  
21 et al., 1993) and Opa74 (Roth et al., 2013), were synthesized in the pET-28a vector background by  
22 GeneScript. Synthesizing Opa expression plasmids bypassed the subcloning described in previous works  
23 that allowed outer membrane expression, so an N-terminal signal sequence from the OMP A protein, native  
24 to the outer membrane of *E. coli*, was added by the manufacturer to express Opa proteins on the outer  
25 membrane of *E. coli*. NcoI and HindIII restriction sites were used to add OMP A and Opa sequences to the  
26 pET-28a plasmid. Opa expression vectors were transformed into *E. coli* DH5α cells for maintenance,

1 replication and sequence verification. Plasmids were extracted for further use using the Zymo Research  
2 Zippy™ Plasmid miniprep kit. For pulldown experiments Opa expression plasmids were transformed into  
3 BL21(DE3) *E. coli* cells to allow for inducible expression of Opa proteins. Cells were grown to an optical  
4 density of OD<sub>600</sub> 0.4-0.6, then IPTG (Isopropyl β- d-1-thiogalactopyranoside) was added to a concentration  
5 of 100mM to induce expression of Opa proteins. Bacterial cells were left to induce for three hours at 37°C.  
6 For pulldown assays 300μL of induced *E. coli* cell culture was incubated with 100μL of CEACAM1 protein  
7 construct as processed as described for *H. pylori*. All *E. coli* cells were cultured at 37°C in LB (Luria-Bertani)  
8 broth.

### 9 *Western blotting and flow cytometry*

10 Pulldown experiments assayed by western blotting were visualized using a commercially available  
11 mixture of Mouse α-GFP clones 7.1 and 13.1 (Sigma-Aldrich) for the primary antibody incubation followed  
12 by secondary incubation with goat α-mouse conjugated to horseradish peroxidase (Jackson  
13 ImmunoResearch) and visualized by WesternBright™ ECL HRP Substrate (Thomas Scientific). For  
14 pulldowns visualized by western blotting CEACAM1 protein input samples were prepared by mixing 20uL of  
15 protein with 20uL 2x Laemmli then boiled at 95°C for five minutes and centrifuged at max speed for five  
16 minutes, before visualization by western blotting along side pulldown samples. GFP fluorescence of primate  
17 CEACAM1 constructs bound to *H. pylori* strain G27 was also measured by flow cytometry, with 10,000 events  
18 per sample measured. Flow cytometry data was analyzed using FlowJo v10.5.3.

### 19 **AUTHOR CONTRIBUTIONS**

20 E.P.B. and M.F.B. conceived the study with input from K.M.K. Phylogenetic analyses were performed by  
21 E.P.B. with assistance from K.M.K. CEACAM-adhesin binding experiments were performed by E.P.B. with  
22 assistance from R.S., E.B., C.K.G., and W.B. Original manuscript was prepared by E.P.B. with input from  
23 M.F.B. All authors contributed to editing of the original manuscript.

## 1 **ACKNOWLEDGMENTS**

2 We are grateful to members of the Barber lab, especially Caitlin Kowalski, for helpful discussions and  
3 feedback on the manuscript. This work was supported by National Institutes of Health grants R35GM133652  
4 (to M.F.B.) and F32AI147565 (to E.P.B). We thank Karen Guillemin for strains and assistance with *H. pylori*  
5 as well as Nina Salama for sharing *H. pylori* strains. We thank Andrew Kern and CJ Battey for helpful  
6 discussions and assistance with population genetic analyses. We thank Nels Elde for thoughtful discussions  
7 related to this work. We thank Jacob Laser for early assistance with CEACAM phylogenetics. We also thank  
8 Scott Gradia for the gift of vector pcDNA3 GFP LIC.

## 9 **COMPETING INTERESTS STATEMENT**

10 The authors declare no competing interests.

## 11 **REFERENCES**

- 12 Adrian J, Bonsignore P, Hammer S, Frickey T, Hauck CR. 2019. Adaptation to Host-Specific Bacterial  
13 Pathogens Drives Rapid Evolution of a Human Innate Immune Receptor. *Curr Biol* **29**:616-630.e5.  
14 doi:10.1016/j.cub.2019.01.058
- 15 Aleru O, Barber MF. 2020. Battlefronts of evolutionary conflict between bacteria and animal hosts. *PLoS*  
16 *Pathog* **16**:e1008797. doi:10.1371/journal.ppat.1008797
- 17 Alm RA, Ling LS, Moir DT, King BL, Brown ED, Doig PC, Smith DR, Noonan B, Guild BC, deJonge BL,  
18 Carmel G, Tummino PJ, Caruso A, Uria-Nickelsen M, Mills DM, Ives C, Gibson R, Merberg D, Mills  
19 SD, Jiang Q, Taylor DE, Vovis GF, Trust TJ. 1999. Genomic-sequence comparison of two unrelated  
20 isolates of the human gastric pathogen *Helicobacter pylori*. *Nature* **397**:176–180.  
21 doi:10.1038/16495
- 22 Anisimova M, Nielsen R, Yang Z. 2003. Effect of recombination on the accuracy of the likelihood method  
23 for detecting positive selection at amino acid sites. *Genetics* **164**:1229–1236.  
24 doi:10.1017/CBO9780511808999



- 1 Baltrus DA, Amieva MR, Covacci A, Lowe TM, Merrell DS, Ottemann KM, Stein M, Salama NR, Guillemin  
2 K. 2009. The complete genome sequence of *Helicobacter pylori* strain G27. *J Bacteriol* **191**:447–  
3 448. doi:10.1128/JB.01416-08
- 4 Barber MF, Elde NC. 2014. Escape from bacterial iron piracy through rapid evolution of transferrin. *Science*  
5 **346**:1362–1366. doi:10.1126/science.1259329
- 6 Bay RA, Bielawski JP. 2011. Recombination detection under evolutionary scenarios relevant to functional  
7 divergence. *J Mol Evol* **73**:273–286. doi:10.1007/s00239-011-9473-0
- 8 Bittihn P, Tsimring LS. 2017. Gene Conversion Facilitates Adaptive Evolution on Rugged Fitness  
9 Landscapes. *Genetics* **207**:1577–1589. doi:10.1534/genetics.117.300350
- 10 Blackmon H, Adams RH. 2015. evobIR: Comparative and population genetic analyses.
- 11 Bonsor DA, Zhao Q, Schmidinger B, Weiss E, Wang J, Deredge D, Beadenkopf R, Dow B, Fischer W,  
12 Beckett D, Wintrode PL, Haas R, Sundberg EJ. 2018. The *Helicobacter pylori* adhesin protein  
13 HopQ exploits the dimer interface of human CEACAMs to facilitate translocation of the oncoprotein  
14 CagA. *EMBO J* **37**:e98664. doi:10.15252/embj.201798664
- 15 Boratyn GM, Camacho C, Cooper PS, Coulouris G, Fong A, Ma N, Madden TL, Matten WT, McGinnis SD,  
16 Merezhuk Y, Raytselis Y, Sayers EW, Tao T, Ye J, Zaretskaya I. 2013. BLAST: a more efficient  
17 report with usability improvements. *Nucleic Acids Res* **41**:W29-33. doi:10.1093/nar/gkt282
- 18 Brewer ML, Dymock D, Brady RL, Singer BB, Virji M, Hill DJ. 2019. *Fusobacterium* spp. target human  
19 CEACAM1 via the trimeric autotransporter adhesin CbpF. *J Oral Microbiol* **11**:1–16.  
20 doi:10.1080/20002297.2018.1565043
- 21 Brockhurst MA, Chapman T, King KC, Mank JE, Paterson S, Hurst GDD. 2014. Running with the Red  
22 Queen: the role of biotic conflicts in evolution. *Proc Biol Sci* **281**. doi:10.1098/rspb.2014.1382
- 23 Brown RL, Clarke TB. 2017. The regulation of host defences to infection by the microbiota. *Immunology*  
24 **150**:1–6. doi:10.1111/imm.12634
- 25 Cao P, Cover TL. 2002. Two different families of hopQ alleles in *Helicobacter pylori*. *J Clin Microbiol*  
26 **40**:4504–4511. doi:10.1128/jcm.40.12.4504-4511.2002
- 27 Chen J-M, Cooper DN, Chuzhanova N, Férec C, Patrinos GP. 2007. Gene conversion: mechanisms,  
28 evolution and human disease. *Nat Rev Genet* **8**:762–775. doi:10.1038/nrg2193

- 1 Daugherty MD, Zanders SE. 2019. Gene conversion generates evolutionary novelty that fuels genetic  
2 conflicts. *Current Opinion in Genetics & Development* **58–59**:49–54. doi:10.1016/j.gde.2019.07.011
- 3 Delport W, Poon AFY, Frost SDW, Kosakovsky Pond SL. 2010. Datamonkey 2010: a suite of phylogenetic  
4 analysis tools for evolutionary biology. *Bioinformatics* **26**:2455–2457.  
5 doi:10.1093/bioinformatics/btq429
- 6 Demogines A, Abraham J, Choe H, Farzan M, Sawyer SL. 2013. Dual Host-Virus Arms Races Shape an  
7 Essential Housekeeping Protein. *PLoS Biol* **11**:1001571. doi:10.1371/journal.pbio.1001571
- 8 Dje N'Guessan P, Vigelahn M, Bachmann S, Zabel S, Opitz B, Schmeck B, Hippenstiel S, Zweigner J,  
9 Riesbeck K, Singer BB, Suttorp N, Slevogt H. 2007. The UspA1 Protein of *Moraxella catarrhalis*  
10 Induces CEACAM-1–Dependent Apoptosis in Alveolar Epithelial Cells. *J Infect Dis* **195**:1651–1660.  
11 doi:10.1086/514820
- 12 Edgar RC. 2004. MUSCLE: multiple sequence alignment with high accuracy and high throughput. *Nucleic  
13 Acids Res* **32**:1792–1797. doi:10.1093/nar/gkh340
- 14 Fox DA, Larsson P, Lo RH, Kroncke BM, Kasson PM, Columbus L. 2014. Structure of the Neisserial outer  
15 membrane protein Opa<sub>60</sub>: loop flexibility essential to receptor recognition and bacterial engulfment.  
16 *J Am Chem Soc* **136**:9938–9946. doi:10.1021/ja503093y
- 17 Gibbs R a., Rogers J, Katze MG, Bumgarner R, Weinstock GM, Mardis ER, Remington K a., Strausberg  
18 RL, Venter JC, Wilson RK, Batzer M a., Bustamante CD, Eichler EE, Hahn MW, Hardison RC,  
19 Makova KD, Miller W, Milosavljevic A, Palermo RE, Siepel A, Sikela JM, Attaway T, Bell S, Bernard  
20 KE, Buhay CJ, Chandrabose MN, Dao M, Davis C, Delehaunty KD, Ding Y, Dinh HH, Dugan-Rocha  
21 S, Fulton L a., Gabisi RA, Garner TT, Godfrey J, Hawes AC, Hernandez J, Hines S, Holder M,  
22 Hume J, Jhangiani SN, Joshi V, Khan ZM, Kirkness EF, Cree A, Fowler RG, Lee S, Lewis LR, Li Z,  
23 Liu Y-S, Moore SM, Muzny D, Nazareth LV, Ngo DN, Okwuonu GO, Pai G, Parker D, Paul H a.,  
24 Pfannkoch C, Pohl CS, Rogers Y-H, Ruiz SJ, Sabo A, Santibanez J, Schneider BW, Smith SM,  
25 Sodergren E, Svatek AF, Utterback TR, Vattathil S, Warren W, White CS, Chinwalla AT, Feng Y,  
26 Halpern AL, Hillier LW, Huang X, Minx P, Nelson JO, Pepin KH, Qin X, Sutton GG, Venter E,  
27 Walenz BP, Wallis JW, Worley KC, Yang S-P, Jones SM, Marra M a., Rocchi M, Schein JE,  
28 Baertsch R, Clarke L, Csürös M, Glasscock J, Harris RA, Havlak P, Jackson AR, Jiang H, Liu Y,

- 1 Messina DN, Shen Y, Song HX-Z, Wylie T, Zhang L, Birney E, Han K, Konkel MK, Lee J, Smit AF  
2 a., Ullmer B, Wang H, Xing J, Burhans R, Cheng Z, Karro JE, Ma J, Raney B, She X, Cox MJ,  
3 Demuth JP, Dumas LJ, Han S-G, Hopkins J, Karimpour-Fard A, Kim YH, Pollack JR, Vinar T, Addo-  
4 Quaye C, Degenhardt J, Denby A, Hubisz MJ, Indap A, Kosiol C, Lahn BT, Lawson H a., Marklein  
5 A, Nielsen R, Vallender EJ, Clark AG, Ferguson B, Hernandez RD, Hirani K, Kehrer-Sawatzki H,  
6 Kolb J, Patil S, Pu L-L, Ren Y, Smith DG, Wheeler D a., Schenck I, Ball EV, Chen R, Cooper DN,  
7 Giardine B, Hsu F, Kent WJ, Lesk A, Nelson DL, O'brien WE, Prüfer K, Stenson PD, Wallace JC,  
8 Ke H, Liu X-M, Wang P, Xiang AP, Yang F, Barber GP, Haussler D, Karolchik D, Kern AD, Kuhn  
9 RM, Smith KE, Zwiig AS. 2007. Evolutionary and biomedical insights from the rhesus macaque  
10 genome. *Science* **316**:222–234. doi:10.1126/science.1139247
- 11 Gray-Owen SD, Blumberg RS. 2006. CEACAM1: Contact-dependent control of immunity. *Nat Rev*  
12 *Immunol* **6**:433–446. doi:10.1038/nri1864
- 13 Guindon S, Dufayard J-F, Lefort V, Anisimova M, Hordijk W, Gascuel O. 2010. New algorithms and  
14 methods to estimate maximum-likelihood phylogenies: assessing the performance of PhyML 3.0.  
15 *Syst Biol* **59**:307–321. doi:10.1093/sysbio/syq010
- 16 Gur C, Maalouf N, Gerhard M, Singer BB, Emgård J, Temper V, Neuman T, Mandelboim O, Bachrach G.  
17 2019a. The *Helicobacter pylori* HopQ outermembrane protein inhibits immune cell activities.  
18 *Oncoimmunology*. doi:10.1080/2162402X.2018.1553487
- 19 Gur C, Maalouf N, Shhadeh A, Berhani O, Singer BB, Bachrach G, Mandelboim O. 2019b. *Fusobacterium*  
20 *nucleatum* supresses anti-tumor immunity by activating CEACAM1. *Oncoimmunology* **8**:1–6.  
21 doi:10.1080/2162402X.2019.1581531
- 22 Hamilton WD, Axelrod R, Tanese R. 1990. Sexual reproduction as an adaptation to resist parasites (a  
23 review). *Proc Natl Acad Sci U S A* **87**:3566–3573. doi:10.1073/pnas.87.9.3566
- 24 Javaheri A, Kruse T, Moonens K, Mejías-luque R, Debraekeleer A, Asche CI, Tegtmeyer N, Kalali B, Bach  
25 NC, Sieber SA, Hill DJ, Königer V, Hauck CR, Moskalenko R, Haas R, Busch DH, Klaile E, Slevogt  
26 H, Schmidt A, Backert S, Remaut H, Singer BB, Gerhard M. 2016. *Helicobacter pylori* adhesin  
27 HopQ engages in a virulence-enhancing interaction with human CEACAMs. *Nature Microbiology*  
28 **17**:16189. doi:10.1038/nmicrobiol.2016.189

- 1 Johswich KO, McCaw SE, Islam E, Sintsova A, Gu A, Shively JE, Gray-Owen SD. 2013. In Vivo Adaptation  
2 and Persistence of *Neisseria meningitidis* within the Nasopharyngeal Mucosa. *PLoS Pathog* **9**.  
3 doi:10.1371/journal.ppat.1003509
- 4 Käll L, Krogh A, Sonnhammer ELL. 2004. A combined transmembrane topology and signal peptide  
5 prediction method. *J Mol Biol* **338**:1027–1036. doi:10.1016/j.jmb.2004.03.016
- 6 Kammerer R, Zimmermann W. 2010. Coevolution of activating and inhibitory receptors within mammalian  
7 carcinoembryonic antigen families. *BMC Biol* **8**. doi:10.1186/1741-7007-8-12
- 8 Katoh K, Standley DM. 2013. MAFFT multiple sequence alignment software version 7: improvements in  
9 performance and usability. *Mol Biol Evol* **30**:772–780. doi:10.1093/molbev/mst010
- 10 Kline KA, Fälker S, Dahlberg S, Normark S, Henriques-Normark B. 2009. Bacterial adhesins in host-  
11 microbe interactions. *Cell Host Microbe* **5**:580–592. doi:10.1016/j.chom.2009.05.011
- 12 Königer V, Holsten L, Harrison U, Busch B, Loell E, Zhao Q, Bonsor DA, Roth A, Kengmo-Tchoupa A,  
13 Smith SI, Mueller S, Sundberg EJ, Zimmermann W, Fischer W, Hauck CR, Haas R. 2016.  
14 *Helicobacter pylori* exploits human CEACAMs via HopQ for adherence and translocation of CagA.  
15 *Nature Microbiology* **2**. doi:10.1038/nmicrobiol.2016.188
- 16 Kosakovsky Pond SL, Frost SDW. 2005. Not so different after all: A comparison of methods for detecting  
17 amino acid sites under selection. *Mol Biol Evol* **22**:1208–1222. doi:10.1093/molbev/msi105
- 18 Kosakovsky Pond SL, Posada D, Gravenor MB, Woelk CH, Frost SDW. 2006. Automated phylogenetic  
19 detection of recombination using a genetic algorithm. *Mol Biol Evol* **23**:1891–1901.  
20 doi:10.1093/molbev/msl051
- 21 Kuespert K, Pils S, Hauck CR. 2006. CEACAMs : their role in physiology and pathophysiology. *Curr Opin*  
22 *Cell Biol* **18**:565–571. doi:10.1016/j.ceb.2006.08.008
- 23 Kuespert K, Weibel S, Hauck CR. 2007. Profiling of bacterial adhesin — host receptor recognition by  
24 soluble immunoglobulin superfamily domains. *J Microbiol Methods* **68**:478–485.  
25 doi:10.1016/j.mimet.2006.10.003
- 26 Kupsch EM, Knepper B, Kuroki T, Heuer I, Meyer TF. 1993. Variable opacity (Opa) outer membrane  
27 proteins account for the cell tropisms displayed by *Neisseria gonorrhoeae* for human leukocytes  
28 and epithelial cells. *EMBO J* **12**:641–650. doi:10.1002/j.1460-2075.1993.tb05697.x

- 1 Mao Y, Catacchio CR, Hillier LW, Porubsky D, Li R, Sulovari A, Fernandes JD, Montinaro F, Gordon DS,  
2 Storer JM, Haukness M, Fiddes IT, Murali SC, Dishuck PC, Hsieh P, Harvey WT, Audano PA,  
3 Mercuri L, Piccolo I, Antonacci F, Munson KM, Lewis AP, Baker C, Underwood JG, Hoekzema K,  
4 Huang T-H, Sorensen M, Walker JA, Hoffman J, Thibaud-Nissen F, Salama SR, Pang AWC, Lee J,  
5 Hastie AR, Paten B, Batzer MA, Diekhans M, Ventura M, Eichler EE. 2021. A high-quality bonobo  
6 genome refines the analysis of hominid evolution. *Nature* **594**:77–81. doi:10.1038/s41586-021-  
7 03519-x
- 8 Markel G, Gruda R, Achdout H, Katz G, Nechama M, Blumberg RS, Kammerer R, Zimmermann W,  
9 Mandelboim O. 2004. The Critical Role of Residues 43R and 44Q of Carcinoembryonic Antigen Cell  
10 Adhesion Molecules-1 in the Protection from Killing by Human NK Cells. *The Journal of*  
11 *Immunology* **173**:3732–3739. doi:10.4049/jimmunol.173.6.3732
- 12 Moonens K, Hamway Y, Neddermann M, Reschke M, Tegtmeyer N, Kruse T, Kammerer R, Mejías-Luque  
13 R, Singer BB, Backert S, Gerhard M, Remaut H. 2018. Helicobacter pylori adhesin HopQ disrupts  
14 trans dimerization in human CEACAMs. *EMBO J* **37**:e98665. doi:10.15252/embj.201798665
- 15 Morgan M. 2019. BiocManager: Access the Bioconductor Project Package Repository.
- 16 Muenzner P, Bachmann V, Zimmermann W, Hentschel J, Hauck CR. 2010. Human-Restricted Bacterial  
17 Pathogens Block Shedding of Epithelial Cells by Stimulating Integrin Activation. *Science* **357**:90.  
18 doi:10.1126/science.1185231
- 19 Muenzner P, Kengmo Tchoupa A, Klauser B, Brunner T, Putze J, Dobrindt U, Hauck CR, Blanke SR. 2016.  
20 Uropathogenic E. coli Exploit CEA to Promote Colonization of the Urogenital Tract Mucosa.  
21 doi:10.1371/journal.ppat.1005608
- 22 Murrell B, Moola S, Mabona A, Weighill T, Sheward D, Kosakovsky Pond SL, Scheffler K. 2013. FUBAR: A  
23 fast, unconstrained bayesian AppRoximation for inferring selection. *Mol Biol Evol* **30**:1196–1205.  
24 doi:10.1093/molbev/mst030
- 25 Murrell B, Wertheim JO, Moola S, Weighill T, Scheffler K, Kosakovsky Pond SL. 2012. Detecting individual  
26 sites subject to episodic diversifying selection. *PLoS Genet* **8**. doi:10.1371/journal.pgen.1002764

- 1 Pavlopoulou A, Scorilas A. 2014. A comprehensive phylogenetic and structural analysis of the  
2 carcinoembryonic antigen (CEA) gene family. *Genome Biol Evol* **6**:1314–1326.  
3 doi:10.1093/gbe/evu103
- 4 Pedersen TL. 2021. ggforce: Accelerating “ggplot2.”
- 5 Pettersen EF, Goddard TD, Huang CC, Couch GS, Greenblatt DM, Meng EC, Ferrin TE. 2004. UCSF  
6 Chimera--a visualization system for exploratory research and analysis. *J Comput Chem* **25**:1605–  
7 1612. doi:10.1002/jcc.20084
- 8 Pond SLK, Frost SDW, Muse SV. 2005. HyPhy: hypothesis testing using phylogenies. *Bioinformatics*  
9 **21**:676–679. doi:10.1093/bioinformatics/bti079
- 10 Prado-Martinez J, Sudmant PH, Kidd JM, Li H, Kelley JL, Lorente-Galdos B, Veeramah KR, Woerner AE,  
11 O'Connor TD, Santpere G, Cagan A, Theunert C, Casals F, Laayouni H, Munch K, Hobolth A,  
12 Halager AE, Malig M, Hernandez-Rodriguez J, Hernando-Herraez I, Prüfer K, Pybus M, Johnstone  
13 L, Lachmann M, Alkan C, Twigg D, Petit N, Baker C, Hormozdiari F, Fernandez-Callejo M, Dabad  
14 M, Wilson ML, Stevison L, Camprub C, Carvalho T, Ruiz-Herrera A, Vives L, Mele M, Abello T,  
15 Kondova I, Bontrop RE, Pusey A, Lankester F, Kiyang JA, Bergl RA, Lonsdorf E, Myers S, Ventura  
16 M, Gagneux P, Comas D, Siegismund H, Blanc J, Agueda-Calpena L, Gut M, Fulton L, Tishkoff SA,  
17 Mullikin JC, Wilson RK, Gut IG, Gonder MK, Ryder OA, Hahn BH, Navarro A, Akey JM, Bertranpetit  
18 J, Reich D, Mailund T, Schierup MH, Hvilsom C, Andrés AM, Wall JD, Bustamante CD, Hammer  
19 MF, Eichler EE, Marques-Bonet T. 2013. Great ape genetic diversity and population history. *Nature*  
20 **499**:471–475. doi:10.1038/nature12228
- 21 Quevillon E, Silventoinen V, Pillai S, Harte N, Mulder N, Apweiler R, Lopez R. 2005. InterProScan: protein  
22 domains identifier. *Nucleic Acids Res* **33**:W116-20. doi:10.1093/nar/gki442
- 23 R Core Team. 2019. R: A Language and Environment for Statistical Computing.
- 24 Roth A, Mattheis C, Muenzner P, Unemo M, Hauck CR. 2013. Innate recognition by neutrophil  
25 granulocytes differs between *Neisseria gonorrhoeae* strains causing local or disseminating  
26 infections. *Infect Immun* **81**:2358–2370. doi:10.1128/IAI.00128-13



- 1 Sadarangani M, Pollard AJ, Gray-Owen SD. 2011. Opa proteins and CEACAMs: pathways of immune  
2 engagement for pathogenic *Neisseria*. *FEMS Microbiology Reviews* **35**:498–514.  
3 doi:10.1111/j.1574-6976.2010.00260.x
- 4 Sintsova A, Wong H, MacDonald KS, Kaul R, Virji M, Gray-Owen SD. 2015. Selection for a CEACAM  
5 receptor-specific binding phenotype during *Neisseria gonorrhoeae* infection of the human genital  
6 tract. *Infect Immun* **83**:1372–1383. doi:10.1128/IAI.03123-14
- 7 Skubitz KM, Skubitz APN. 2008. Interdependency of CEACAM-1, -3, -6, and -8 induced human neutrophil  
8 adhesion to endothelial cells. *J Transl Med* **6**:78. doi:10.1186/1479-5876-6-78
- 9 Tchoupa AK, Schuhmacher T, Hauck CR. 2014. Signaling by epithelial members of the CEACAM family –  
10 mucosal docking sites for pathogenic bacteria. *Cell Commun Signal* **12**:1–10. doi:10.1186/1478-  
11 811X-12-27
- 12 van Sorge NM, Bonsor DA, Deng L, Lindahl E, Schmitt V, Lyndin M, Schmidt A, Nilsson OR, Brizuela J,  
13 Boero E, Sundberg EJ, van Strijp JAG, Doran KS, Singer BB, Lindahl G, McCarthy AJ. 2021.  
14 Bacterial protein domains with a novel Ig-like fold target human CEACAM receptors. *EMBO J*  
15 e106103. doi:10.15252/embj.2020106103
- 16 Van Valen L. 1973. A new evolutionary law. *Evolutionary Theory* **1**:1–30.
- 17 Wang J, Gray-Owen SD, Knorre A, Meyer TF, Dehio C. 1998. Opa binding to cellular CD66 receptors  
18 mediates the transcellular traversal of *Neisseria gonorrhoeae* across polarized T84 epithelial cell  
19 monolayers. *Mol Microbiol* **30**:657–671. doi:10.1046/j.1365-2958.1998.01102.x
- 20 Wang L-G, Lam TT-Y, Xu S, Dai Z, Zhou L, Feng T, Guo P, Dunn CW, Jones BR, Bradley T, Zhu H, Guan  
21 Y, Jiang Y, Yu G. 2019. treeio: an R package for phylogenetic tree input and output with richly  
22 annotated and associated data. *Molecular Biology and Evolution*. doi:10.1093/molbev/msz240
- 23 Weaver S, Shank SD, Spielman SJ, Li M, Muse SV, Kosakovsky Pond SL. 2018. Datamonkey 2.0: A  
24 Modern Web Application for Characterizing Selective and Other Evolutionary Processes. *Mol Biol*  
25 *Evol* **35**:773–777. doi:10.1093/molbev/msx335
- 26 Wickham H. 2016. ggplot2: Elegant Graphics for Data Analysis.

- 1 Wilson D, Pethica R, Zhou Y, Talbot C, Vogel C, Madera M, Chothia C, Gough J. 2009. SUPERFAMILY--  
2 sophisticated comparative genomics, data mining, visualization and phylogeny. *Nucleic Acids Res*  
3 **37**:D380-6. doi:10.1093/nar/gkn762
- 4 Yang DC, Blair KM, Taylor JA, Petersen TW, Sessler T, Tull CM, Leverich CK, Collar AL, Wyckoff TJ,  
5 Biboy J, Vollmer W, Salama NR. 2019. A Genome-Wide Helicobacter pylori Morphology Screen  
6 Uncovers a Membrane-Spanning Helical Cell Shape Complex. *J Bacteriol* **201**.  
7 doi:10.1128/JB.00724-18
- 8 Yang Z. 2007. PAML 4: Phylogenetic Analysis by Maximum Likelihood. *Mol Biol Evol* **24**:1586–1591.  
9 doi:10.1093/molbev/msm088
- 10 Yang Z, Wong WSW, Nielsen R. 2005. Bayes empirical bayes inference of amino acid sites under positive  
11 selection. *Mol Biol Evol* **22**:1107–1118. doi:10.1093/molbev/msi097
- 12 Yu G, Lam TT-Y, Zhu H, Guan Y. 2018. Two Methods for Mapping and Visualizing Associated Data on  
13 Phylogeny Using ggtree. *Mol Biol Evol* **35**:3041–3043. doi:10.1093/molbev/msy194
- 14 Yu G, Smith DK, Zhu H, Guan Y, Lam TT. 2017. ggtree : An r package for visualization and annotation of  
15 phylogenetic trees with their covariates and other associated data. *Methods Ecol Evol* **8**:28–36.  
16 doi:10.1111/2041-210x.12628
- 17 Zid M, Drouin G. 2013. Gene conversions are under purifying selection in the carcinoembryonic antigen  
18 immunoglobulin gene families of primates. *Genomics* **102**:301–309.  
19 doi:10.1016/j.ygeno.2013.07.003
- 20 Zimmermann W. 2019. Evolution: Decoy Receptors as Unique Weapons to Fight Pathogens. *Current*  
21 *Biology*. doi:10.1016/j.cub.2018.12.006

# 1 EXTENDED AND SUPPLEMENTARY FIGURES

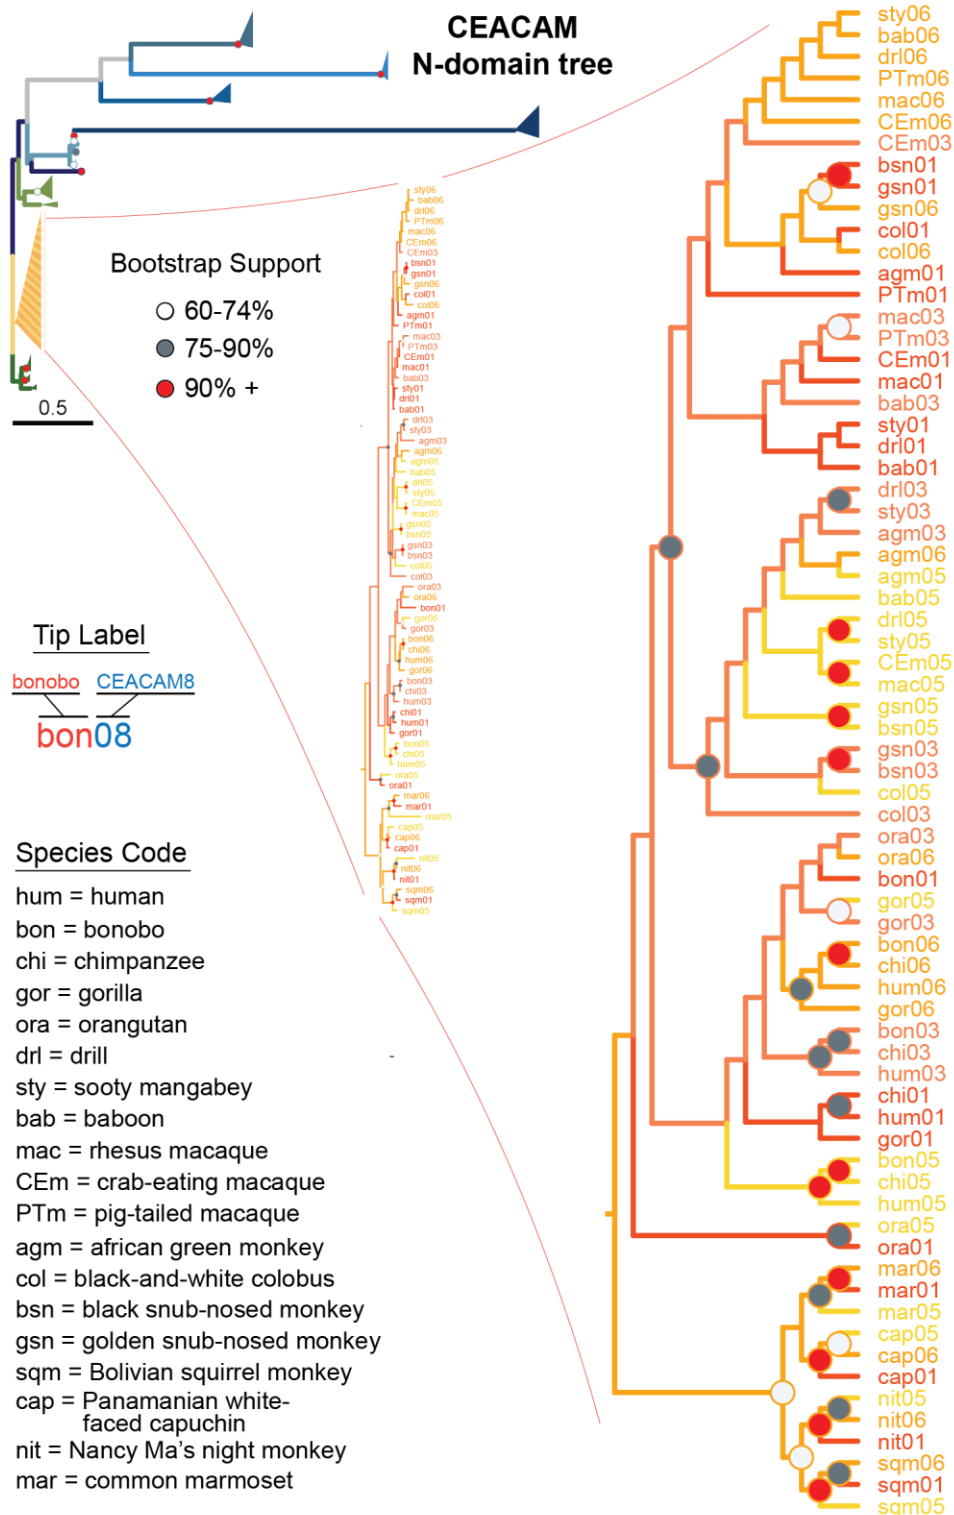

2 Extended Fig. 1

3 Expanded view of CEACAM1, CEACAM3, CEACAM5 and CEACAM6 clade from Fig. 4B.

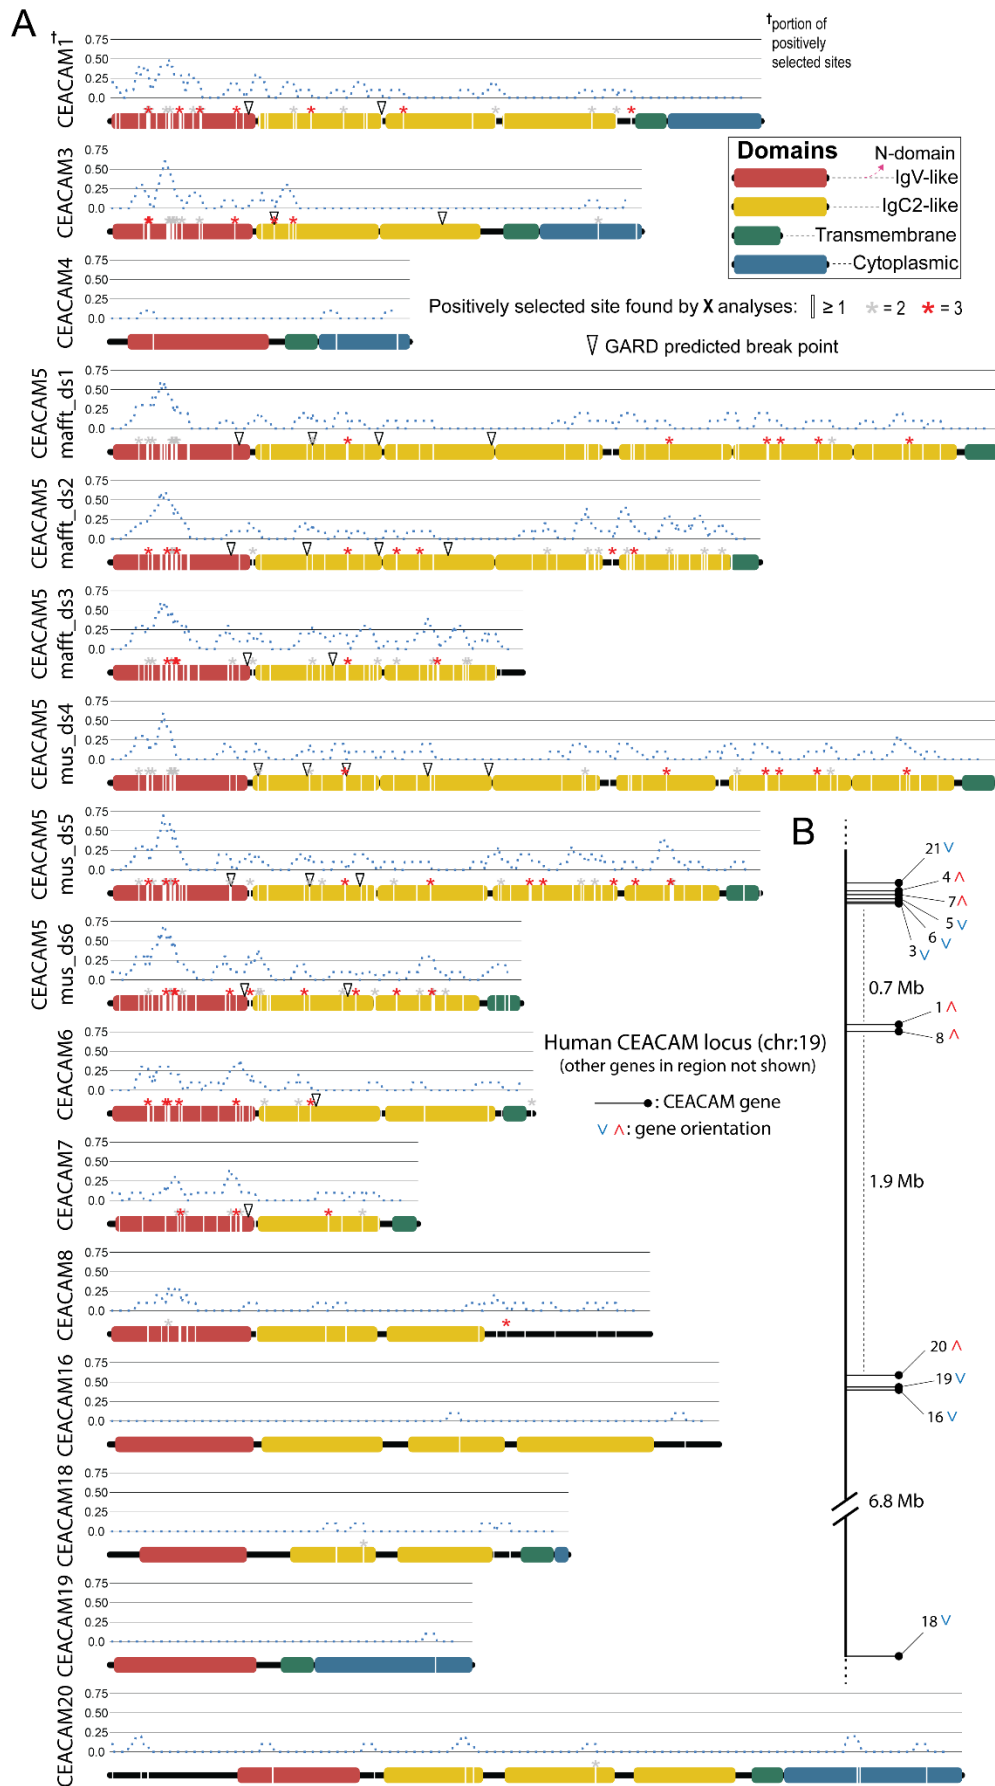

1 Fig. S1

2 Sites with elevated dN/dS in all human CEACAM proteins. A) Sites in CEACAM proteins identified as evolving  
3 rapidly in specific domains by one (white line), two (gray asterisks) or three (red asterisks) evolutionary  
4 analyses. Dotted blue line indicates the proportion of sites identified as evolving rapidly across a ten amino  
5 acid sliding window. Open triangles show GARD predictions of the approximate locations of recombination  
6 breakpoints. B) Location of human CEACAM genes along chromosome 19. Other genes on chromosome 19  
7 are not shown.

8

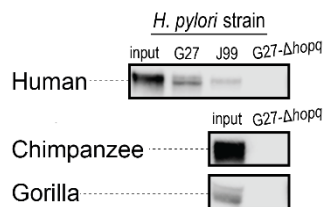

1 Fig. S2

2 Binding assay to assess interactions between *H. pylori* strain G27  $\Delta$ hopq and GFP-tagged CEACAM1 N-  
3 domain constructs for human, chimpanzee, and gorilla, by pulldown experiments and visualization by  
4 western blot.

5

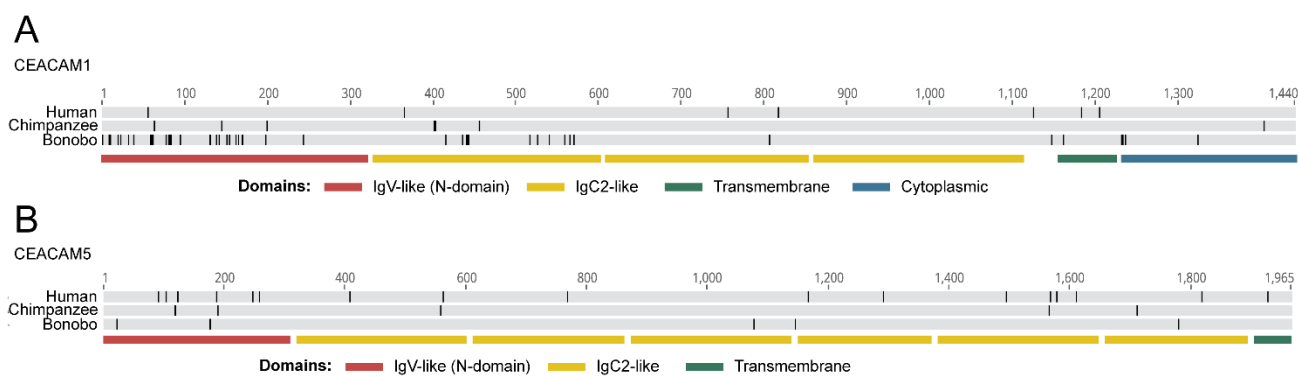

6 Fig. S3

7 Bonobo CEACAM sequence alignments. Human, chimpanzee and bonobo CEACAM1 (A) and CEACAM5  
8 (B) alignments by MAFFT translation alignment implemented in Geneious Prime 2020.2.2. Black lines mark  
9 differences from consensus. Lower lines show location of CEACAM domains.



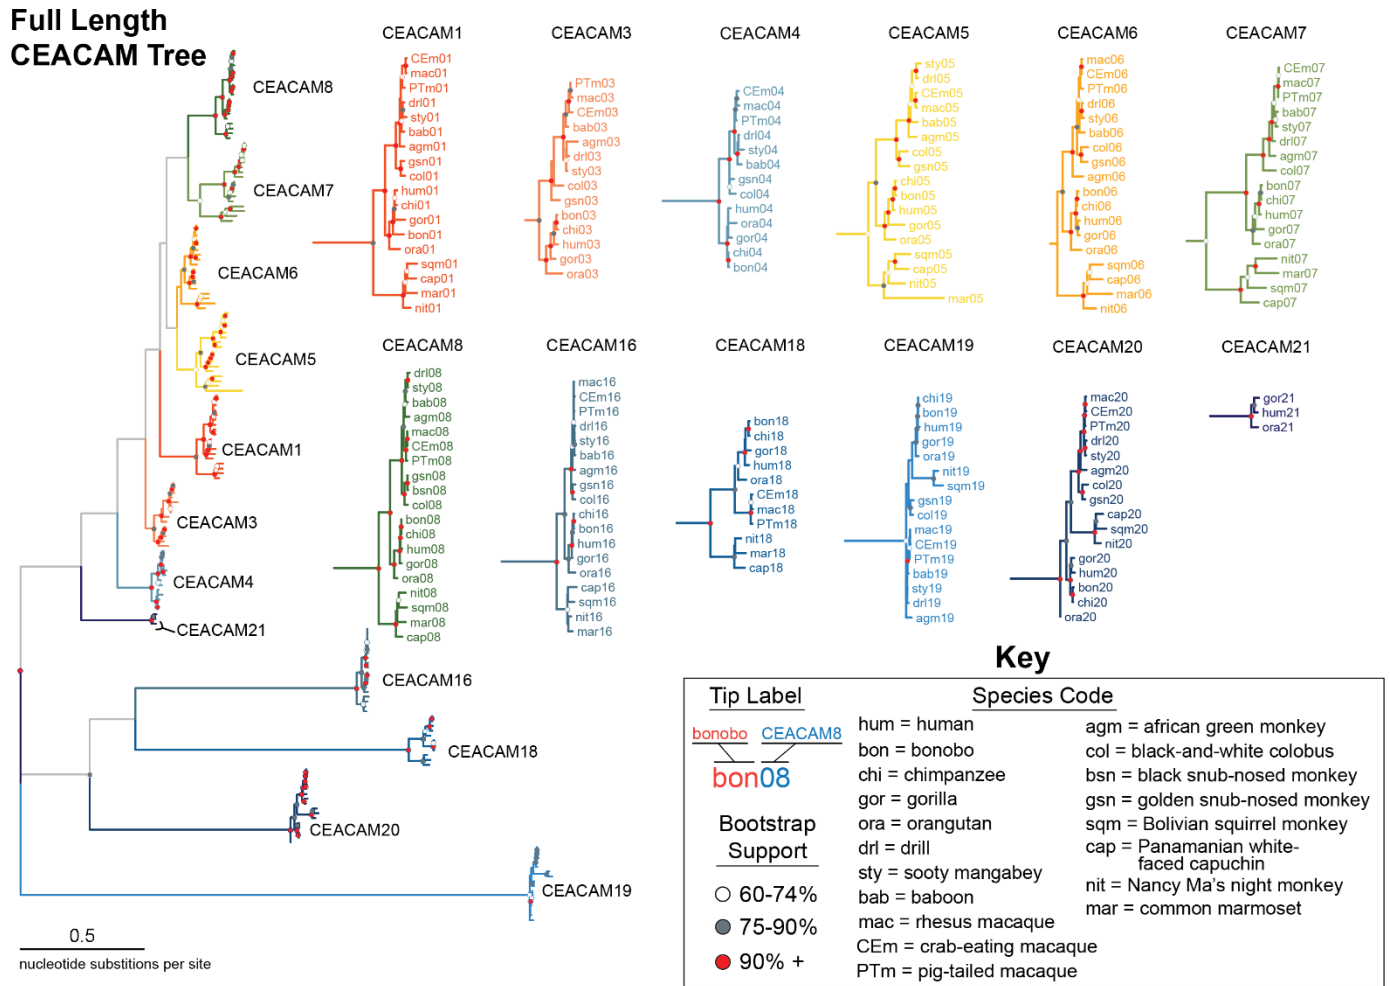

- 1 Fig. S4
- 2 Maximum likelihood-based phylogeny of full length CEACAM protein coding sequences as represented in
- 3 Fig. 4A, but with clades expanded. Clades encompassing individual CEACAM orthologs are shown isolated
- 4 and expanded.

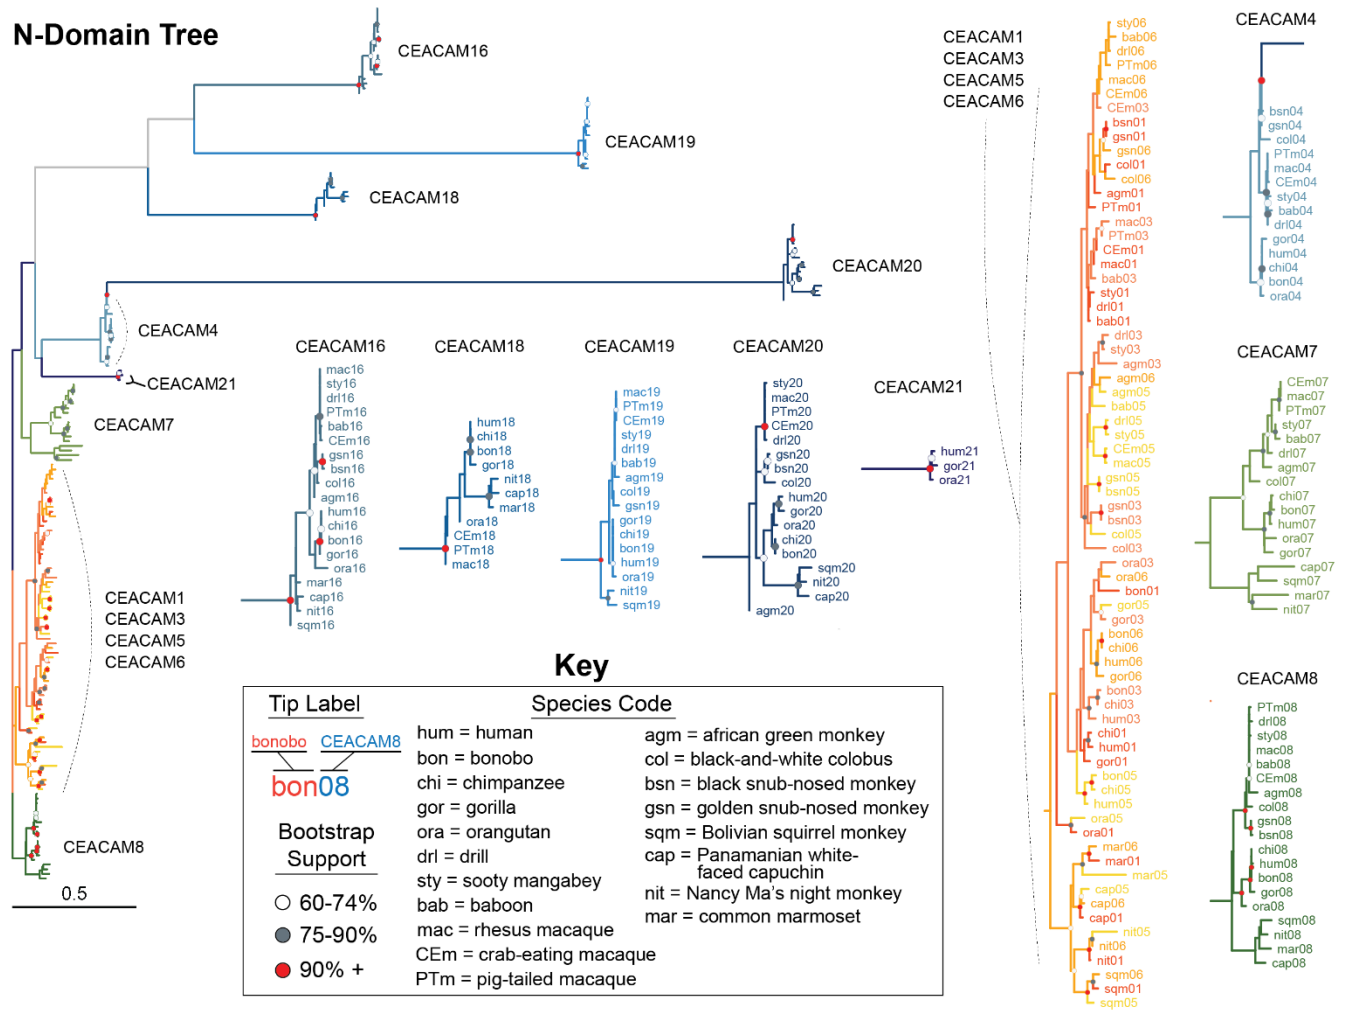

- 1 Fig. S5
- 2 Maximum likelihood-based phylogeny of CEACAM IgV-like (N-domain) sequences as represented in Fig. 4B,
- 3 but with clades expanded. Clades encompassing individual CEACAM orthologs along with the CEACAM1,
- 4 CEACAM3, CEACAM5 and CEACAM6 clade are shown isolated and expanded.

## IgC Domain Tree

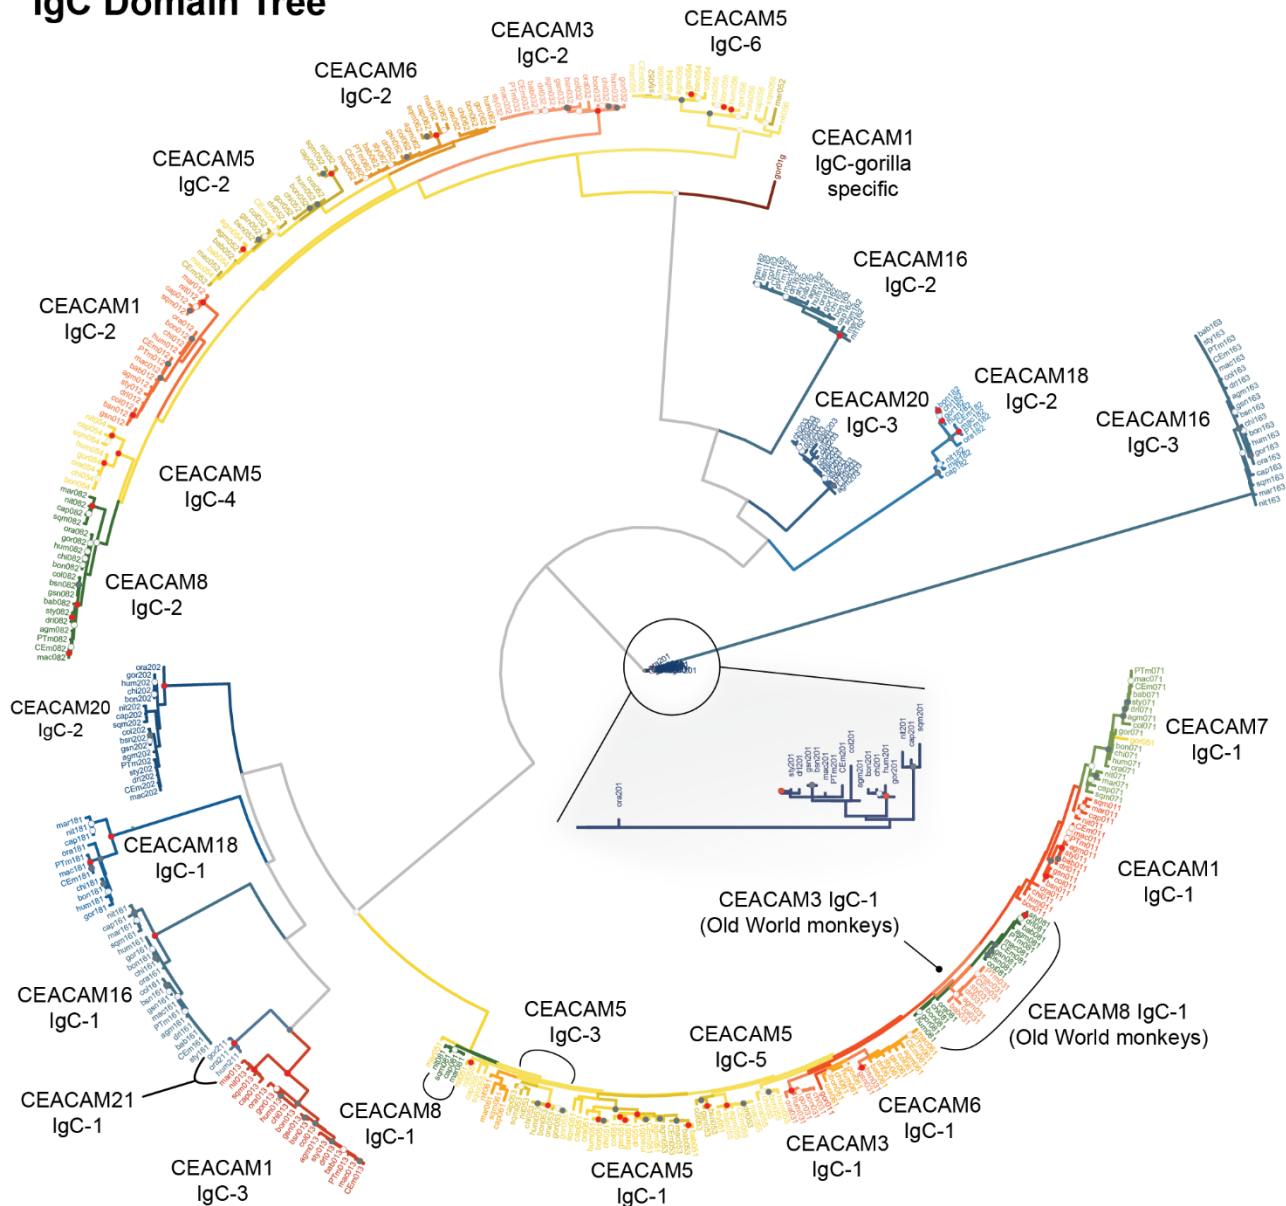

### Key

| Tip Label                    | Species Code                                               |
|------------------------------|------------------------------------------------------------|
| <b>bonobo</b> <b>CEACAM8</b> | hum = human                                                |
| <b>bon081</b>                | agm = african green monkey                                 |
| IgC Domain*                  | col = black-and-white colobus                              |
|                              | bsn = black snub-nosed monkey                              |
|                              | gsn = golden snub-nosed monkey                             |
|                              | sqm = Bolivian squirrel monkey                             |
|                              | cap = Panamanian white-faced capuchin                      |
|                              | nit = Nancy Ma's night monkey                              |
|                              | mar = common marmoset                                      |
| <b>Bootstrap Support</b>     | CEm = crab-eating macaque                                  |
| ○ 60-74%                     | PTm = pig-tailed macaque                                   |
| ● 75-90%                     |                                                            |
| ● 90% +                      | *IgC domains numbered starting from most N-terminal domain |

- 1 Fig. S6
- 2 Maximum likelihood-based phylogeny of CEACAM IgC-like domain sequences. Expanded view of
- 3 CEACAM20 clade shown.

## Cytoplasmic Domain Tree

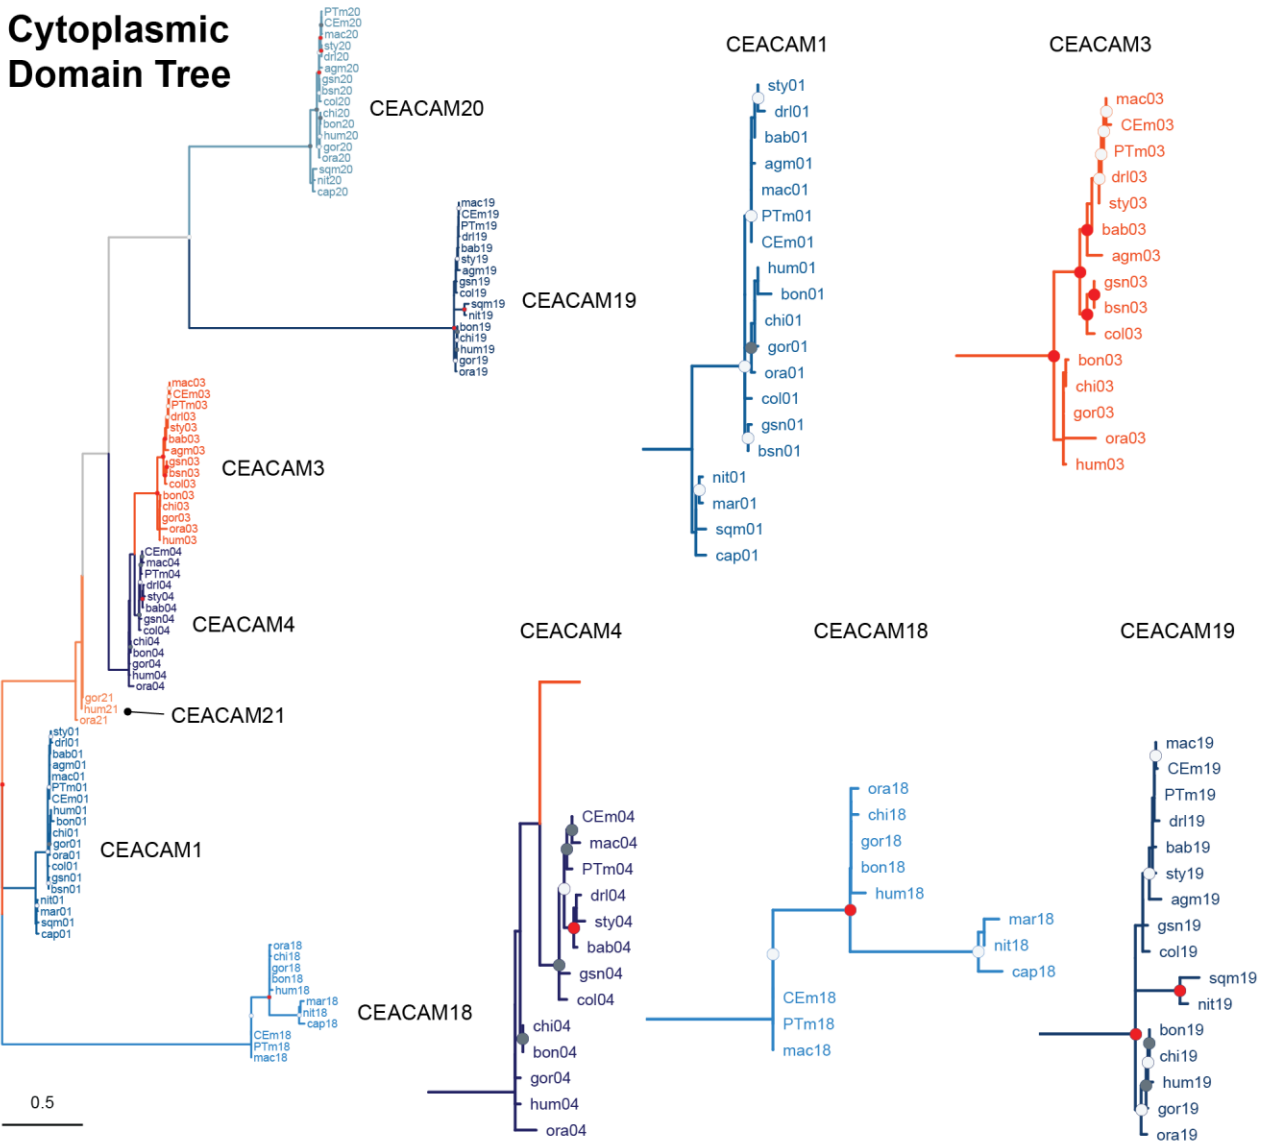

CEACAM20

CEACAM21

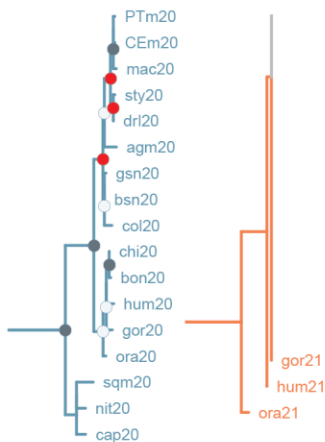

## Key

| Tip Label | Species Code                          |
|-----------|---------------------------------------|
| bonobo    | hum = human                           |
| CEACAM8   | bon = bonobo                          |
| bon08     | chi = chimpanzee                      |
|           | gor = gorilla                         |
|           | ora = orangutan                       |
|           | dri = drill                           |
|           | sty = sooty mangabey                  |
|           | bab = baboon                          |
|           | mac = rhesus macaque                  |
|           | CEm = crab-eating macaque             |
|           | PTm = pig-tailed macaque              |
|           | agm = african green monkey            |
|           | col = black-and-white colobus         |
|           | bsn = black snub-nosed monkey         |
|           | gsn = golden snub-nosed monkey        |
|           | sqm = Bolivian squirrel monkey        |
|           | cap = Panamanian white-faced capuchin |
|           | nit = Nancy Ma's night monkey         |
|           | mar = common marmoset                 |

### Bootstrap Support

- 60-74%
- 75-90%
- 90% +

- 1 Fig. S7
- 2 Maximum likelihood-based phylogeny of CEACAM cytoplasmic domain sequences. Clades encompassing
- 3 individual CEACAM orthologs are shown isolated and expanded.





1 Fig. S8

2 Multiple sequence alignment of CEACAM1, CEACAM3, CEACAM5 and CEACAM8 orthologs for human,  
3 bonobo, chimpanzee, gorilla, and orangutan. Translation of each nucleotide sequence is positioned on the  
4 line below. Sites known to influence adhesin and host protein binding (TableS3) are indicated as are sites  
5 identified as evolving under positive selection.

|            |                                 |            |                |             |             |                     |                                    |                                    |             |                                      |             |                                      |             |                                      |             |                                      |             |                                      |                  |                                      |             |                                      |
|------------|---------------------------------|------------|----------------|-------------|-------------|---------------------|------------------------------------|------------------------------------|-------------|--------------------------------------|-------------|--------------------------------------|-------------|--------------------------------------|-------------|--------------------------------------|-------------|--------------------------------------|------------------|--------------------------------------|-------------|--------------------------------------|
| 103<br>(1) | 113<br>(4)                      | 122<br>(7) | 126-7<br>(6-9) | 131<br>(10) | 135<br>(11) | 153<br>(17)         | 159<br>(19)                        | 183<br>(27)                        | 210<br>(36) | 229<br>(43)                          | 233<br>(44) | 238<br>(46)                          | 248<br>(49) | 277<br>(59)                          | 283<br>(61) | 288<br>(62)                          | 299<br>(66) | 307<br>(69)                          | 333-4<br>(77-78) | 338<br>(79)                          | 350<br>(83) | 369<br>(89)                          |
| CFACAM1    | CAGCTCACACTGATCCGATCCGATTCATGTT | GTTCCTTC   | CF             | GG          | GG          | CGTAAATGTAGGATATCCA | CCCGCAACACACGGTCCGAGACACAAATATACCC | CCCGCAACACACGGTCCGAGACACAAATATACCC | AE          | CGTACCCGAGATGACACAGGATTCACACCCCTACAA | AE          | CGTACCCGAGATGACACAGGATTCACACCCCTACAA | AE          | CGTACCCGAGATGACACAGGATTCACACCCCTACAA | AE          | CGTACCCGAGATGACACAGGATTCACACCCCTACAA | AE          | CGTACCCGAGATGACACAGGATTCACACCCCTACAA | AE               | CGTACCCGAGATGACACAGGATTCACACCCCTACAA | AE          | CGTACCCGAGATGACACAGGATTCACACCCCTACAA |
| CFACAM3    | AAGTCACTATTGATCCATGCCGCTCAGTGC  | GTTCCTTC   | CF             | GG          | GG          | CGTAAATGTAGGATATCCA | CCCGCAACACACGGTCCGAGACACAAATATACCC | CCCGCAACACACGGTCCGAGACACAAATATACCC | AE          | CGTACCCGAGATGACACAGGATTCACACCCCTACAA | AE          | CGTACCCGAGATGACACAGGATTCACACCCCTACAA | AE          | CGTACCCGAGATGACACAGGATTCACACCCCTACAA | AE          | CGTACCCGAGATGACACAGGATTCACACCCCTACAA | AE          | CGTACCCGAGATGACACAGGATTCACACCCCTACAA | AE               | CGTACCCGAGATGACACAGGATTCACACCCCTACAA | AE          | CGTACCCGAGATGACACAGGATTCACACCCCTACAA |
| CFACAM5    | AAGTCACTATTGATCCATGCCGCTCAGTGC  | GTTCCTTC   | CF             | GG          | GG          | CGTAAATGTAGGATATCCA | CCCGCAACACACGGTCCGAGACACAAATATACCC | CCCGCAACACACGGTCCGAGACACAAATATACCC | AE          | CGTACCCGAGATGACACAGGATTCACACCCCTACAA | AE          | CGTACCCGAGATGACACAGGATTCACACCCCTACAA | AE          | CGTACCCGAGATGACACAGGATTCACACCCCTACAA | AE          | CGTACCCGAGATGACACAGGATTCACACCCCTACAA | AE          | CGTACCCGAGATGACACAGGATTCACACCCCTACAA | AE               | CGTACCCGAGATGACACAGGATTCACACCCCTACAA | AE          | CGTACCCGAGATGACACAGGATTCACACCCCTACAA |

..... : High frequency variant similar to CFACAM3/CFACAM5    
 ..... : Other CFACAM3/CFACAM5-like variants    
 ● : G219A (V39), common unique synonymous SNP in CFACAM1

1 Fig. S9

2 Other CEACAM-like human CEACAM1 haplotypes. Alignment of human CEACAM1, CEACAM3 and  
3 CEACAM5 N-domain reference nucleotide sequences with amino acid translations below. Long invariable  
4 alignment regions were removed. Sites that differ in CEACAM3 or CEACAM5 relative to CEACAM1 are  
5 bolded. Sites found in variant CEACAM1 haplotypes are in black. Changes that encode the high frequency  
6 variants Q1K, A49V, and Q89H are in red. Below alignment each row is a unique human CEACAM1 N-  
7 domain haplotype. Lines indicate variant regions in CEACAM1. Only haplotypes that increase similarity to  
8 CEACAM3 or CEACAM5 are shown.

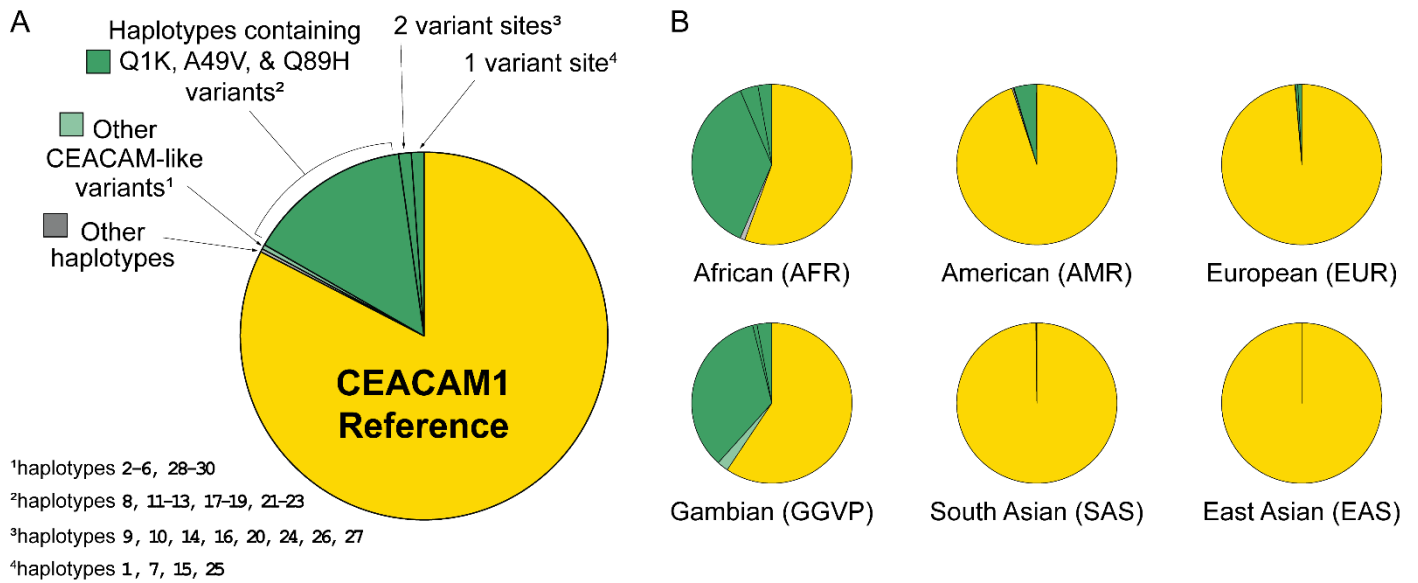

1 Fig. S10

- 2 Frequency of variant human CEACAM1 haplotypes. A) Overall frequency of CEACAM1 variants Q1K, A49V,  
3 Q89H and other variant haplotypes in humans. The indicated CEACAM-like haplotypes are enumerated in  
4 Fig. 9. B) Frequency of CEACAM1 variants across different human populations.

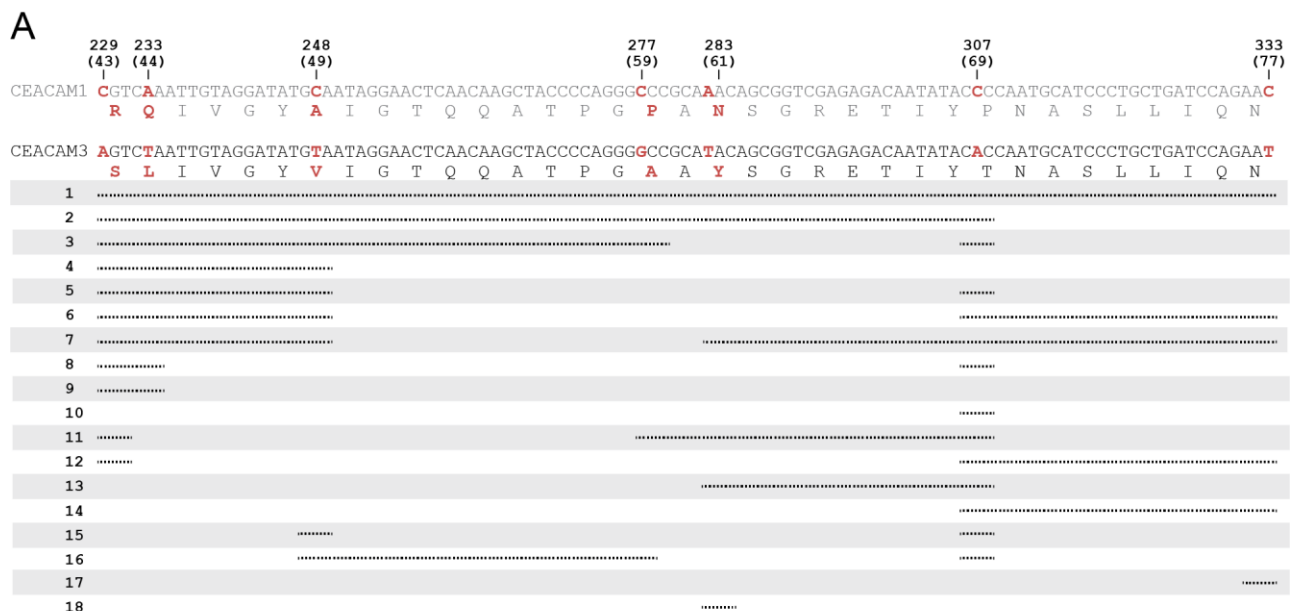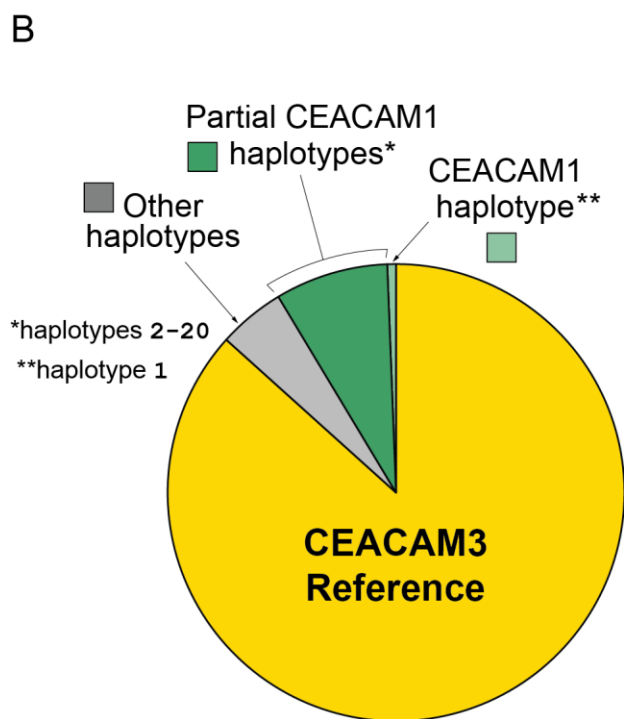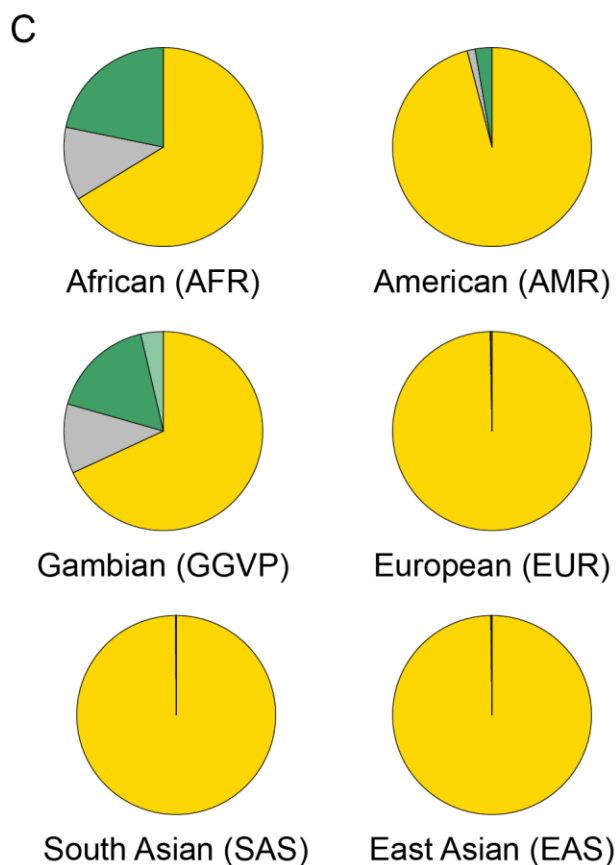

1 Fig. S11

2 Human CEACAM1-like CEACAM3 haplotypes. A) Alignment of human CEACAM1 and CEACAM3 reference  
3 sequences. Disagreements are bolded in red with the amino acid translation below each sequence. Below  
4 alignment each row represents a unique human CEACAM3 haplotype. Lines indicate variant regions that  
5 match the human CEACAM1 reference sequence. Only haplotypes that increase similarity to the human

- 1 CEACAM1 reference sequence are shown. B) Overall frequency of variant CEACAM3 haplotypes in humans.
- 2 The CEACAM1-like haplotypes indicated are enumerated in panel A. C) Frequency of CEACAM3 variants
- 3 across different human populations.



A

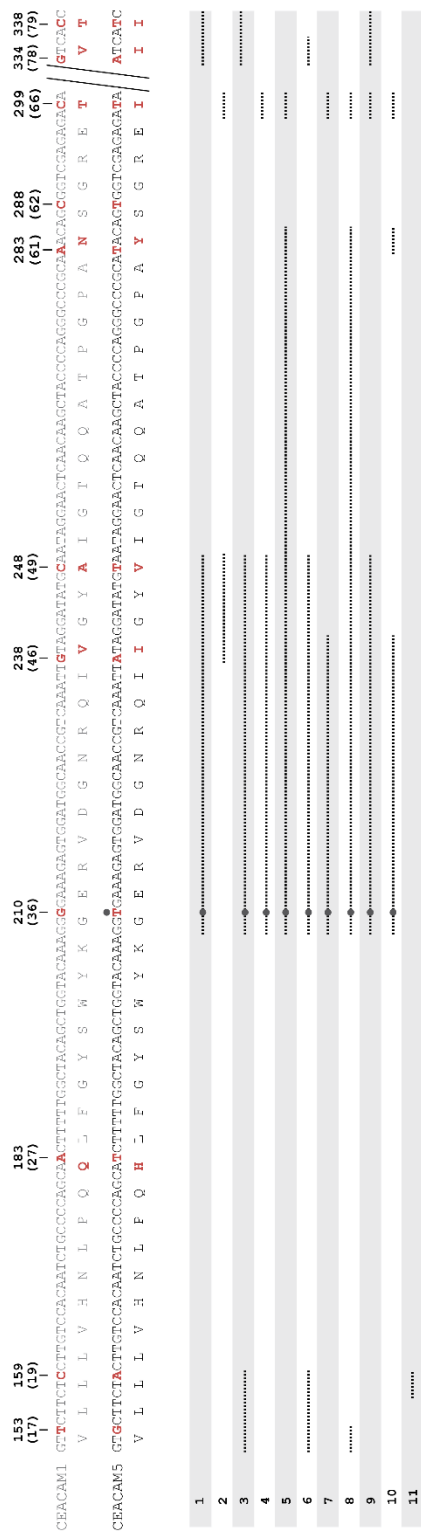

B

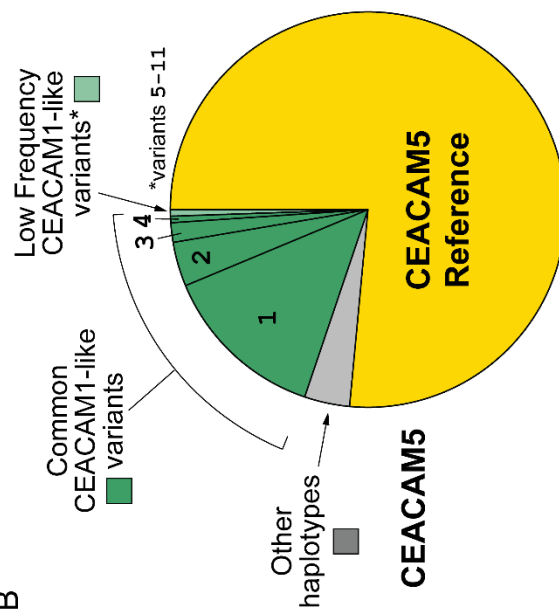

C

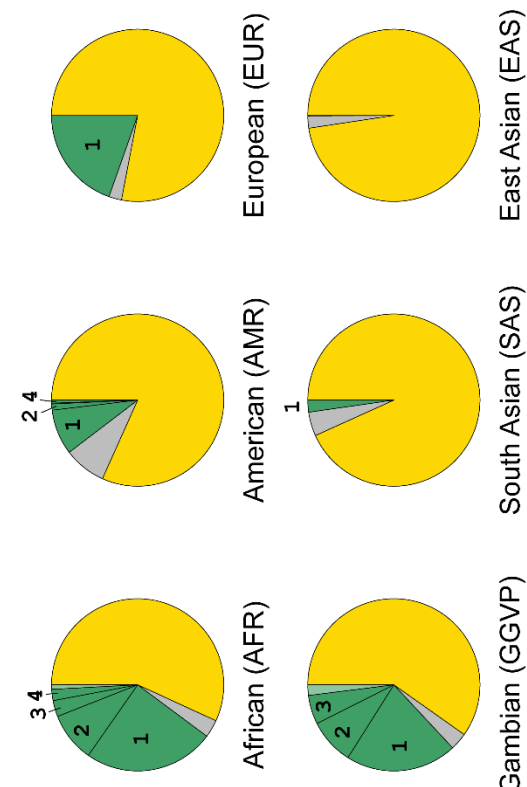

1 Fig. S12

2 Human CEACAM1-like CEACAM5 haplotypes. A) Alignment of human CEACAM1 and CEACAM5 reference  
3 sequences. Disagreements are bolded in red with the amino acid translation below each sequence. Below  
4 alignment each row represents a unique human CEACAM5 haplotype. Lines indicate variant regions that  
5 match the human CEACAM1 reference sequence. Only haplotypes that increase similarity to the human  
6 CEACAM1 reference sequence are shown. B) Overall frequency of variant CEACAM5 haplotypes in humans.  
7 The CEACAM1-like haplotypes indicated are enumerated in panel A. C) Frequency of CEACAM5 variants  
8 across different human populations.

9

10 Excel S1

11 Primate CEACAM sequences extracted for evolutionary analyses and phylogenetic reconstructions.

12

13 Table S1

14 PAML NS sites tests of selection in primate CEACAMs

15

16 Table S2

17 Sites identified as evolving under positive selection by evolutionary analyses and GARD predicted  
18 recombination breakpoints.

19

20 Table S3

21 References for sites identified as contributing to CEACAM1 binding with host proteins and bacterial adhesins  
22 as well as the specific sites identified.

23

24 Table S4

25 Table of oligomers, DNA templates and their order in assembly reactions used to assemble CEACAM1 N-  
26 domain expression plasmids.

27

28 Table S5

- 1 Sources of template sequences for CEACAM1 and other plasmid components used for expression plasmid
- 2 construction.
- 3
